# Supplementary material for: Systematic Identification and Functional Validation of New snoRNAs in Human Muscle Progenitors
Source: Noncoding RNA. 2021 Sep 13;7(3):56. doi: 10.3390/ncrna7030056 (PMC8482216; doi:10.3390/ncrna7030056)
Supplement: Supplementary file 1 [file ncrna-07-00056-s001.zip]

Archive with 5 entries (5 files):
- Suppl_file.pdf
- TableS1.xlsx
- TableS2.pdf
- TableS3.xlsx
- TableS4.xlsx
