# Supplementary material for: Systematic Identification and Functional Validation of New snoRNAs in Human Muscle Progenitors
Source: Noncoding RNA. 2021 Sep 13;7(3):56. doi: 10.3390/ncrna7030056 (PMC8482216; doi:10.3390/ncrna7030056)
Supplement: Supplementary file 1 [file ncrna-07-00056-s001.zip › TableS1.xlsx]

## Sheet: Candidates
				Raw count						Blast
	Chr	Start	End	MB	MT	Type	Size (nt)	snoReport	snoGPS	Homolog	Family	Query cover	E value	Identity	Accession	Strand	intron N°	intron (total number)	Gene name	RefSeq ID
#1	chr1	1328968	1329120	55	3	intron	152									-	4	11	CCNL2	NM_030937
#2	chr1	6556756	6556936	22	155	intron	180		Yes							-	1	22	PLEKHG5	NM_001265592
#3	chr1	14081213	14081310	13	4	intron	97									+	1	5	PRDM2	NM_001007257
#4	chr1	15868653	15868799	3	27	intron	146		Yes	SCARNA21	scaRNA	0.95	3e-42	0.88	NR_003000.1	+	4	13	DNAJC16	NM_015291
#5	chr1	19557531	19557623	9	6	intron	92									-	16	23	EMC1	NM_001271428
#6	chr1	22259902	22259970	12	5	intron	68									-	1	97	HSPG2	NM_005529
#7	chr1	28807877	28807993	152	167	intron	116			RNU6ATAC	RNU	0.99	7e-38	0.9	NR_023344.1	+	9	14	PHACTR4	NM_001048183
#8	chr1	28834695	28834901	52	1	intron	206		Yes	SNHG3 gene intronic	snoRNA	0.42	9e-40	1	HG491818.1	+	3	4	SNHG3	NR_036473
#9	chr1	28835045	28835341	37070	45733	intron	296			SNORA73B	snoRNA	0.69	2e-105	1	NR_004404.2	+	3	4	SNHG3	NR_036473
#10	chr1	29583871	29583942	3	0	intron	71									+	2	31	PTPRU	NM_005704
#11	chr1	33808217	33808451	27	16	intron	234									-	1	7	PHC2	NM_004427
#12	chr1	36883968	36884199	2733	3790	intron	231		Yes	SNORA63C	snoRNA	0.61	3e-64	1	NR_145725.1	-	9	10	OSCP1	NM_145047
#13	chr1	45136623	45136731	603	760	intron	108			SNORD145	snoRNA	0.94	3e-40	1	NR_145816.1	-	1	3	TMEM53	NM_024587
#14	chr1	45227685	45227798	741	47	intron	113			SNORD160	snoRNA	0.67	6e-32	1	NR_145793.1	+	17	21	KIF2C	NM_006845
#15	chr1	52190439	52190580	241	631	intron	141		Yes	SNORA26	snoRNA	0.86	2e-45	0.92	NR_003016.1	+	4	24	OSBPL9	NM_148909
#16	chr1	54236687	54236827	2833	3408	intron	140		Yes	SNORA58	snoRNA	0.99	6e-47	0.91	NR_002985.2	-	17	18	NDC1	NM_001168551
#17	chr1	92694146	92694526	118	3	intron	380		Yes							+	1	6	C1orf146	NM_001012425
#18	chr1	92764266	92764338	35	10	intron	72									-	1	19	GLMN	NM_053274
#19	chr1	145382753	145383153	403	66	intron	400			RNU1-4	RNU	0.41	1e-82	1	NR_104085.1	+	16	21	NBPF15	NM_001170755
#20	chr1	145969244	145969427	496	552	intron	183			RNU1-4	RNU	0.86	3e-79	1	NR_004426.2	+	68	85	NBPF10	NM_001039703
#21	chr1	147775583	147775706	12	1	intron	123			RNVU1-18	RNU	0.69	7e-21	0.78	NR_004400.1	-	18	20	NBPF8	NM_001037501
#22	chr1	147806704	147806886	15	2	intron	182		Yes	RNVU1-21	RNU	0.69	7e-19	0.78	NR_004400.1	-	18	20	NBPF8	NM_001037501
#23	chr1	151500312	151500412	424	160	intron	100			SNORA44	snoRNA	0.91	1e-27	0.9	NR_002976.1	+	10	21	CGN	NM_020770
#24	chr1	156105912	156106004	27	11	intron	92									+	9	13	LMNA	NM_005572
#25	chr1	159821695	159821762	44125	180575	intron	67			SNORD64	snoRNA	0.69	1e-09	0.87	NR_028529.1	-	2	6	C1orf204	NM_001134233
#26	chr1	179170620	179170765	1491	1477	intron	145	Yes	Yes	SNORA67	snoRNA	0.97	1e-48	0.91	NR_002912.1	-	1	13	ABL2	NM_001168237
#27	chr1	201262712	201262780	0	0	intron	68									+	1	15	PKP1	NM_000299
#28	chr1	205700346	205700481	360	1214	intron	135			SNORA72	snoRNA	0.97	2e-36	0.87	NR_002581.1	-	1	7	NUCKS1	NM_022731
#29	chr1	210547147	210547635	215210	190532	intron	488		Yes	RNU5B-1	RNU	0.22	7e-31	0.9	NR_002757.3	+	1	10	HHAT	NM_018194
#30	chr1	210860556	210860727	38	203	intron	171									-	10	11	KCNH1	NM_172362
#31	chr1	212198946	212199025	728	1409	intron	79			SNORA26	snoRNA	0.98	9e-24	0.91	NR_003016.1	-	1	21	INTS7	NR_037667
#32	chr1	215803392	215803458	38	90	intron	66			SNORD116	snoRNA	0.95	6e-20	0.94	NR_003330.2	-	70	72	USH2A	NM_206933
#33	chr1	222831711	222831795	91	25	intron	84									+	18	28	MIA3	NM_198551
#34	chr10	3176299	3176493	67	24	intron	194		Yes	SNORD142	snoRNA	0.98	1e-97	1	NR_132758.2	+	19	22	PFKP	NM_002627
#35	chr10	14058855	14058954	24	77	intron	99									-	2	25	FRMD4A	NM_018027
#36	chr10	14227462	14227626	134	42	intron	164		Yes							-	2	25	FRMD4A	NM_018027
#37	chr10	23286161	23286456	642	271	intron	295		Yes	RNA5S1	RNU	0.33	7e-19	0.89	NR_023363.1	+	10	19	ARMC3	NM_173081
#38	chr10	24813029	24813157	36	23	intron	128	Yes								+	13	19	KIAA1217	NM_001098500
#39	chr10	73940614	73940737	18	20	intron	123									-	2	8	ASCC1	NM_001198799
#40	chr10	74113778	74113928	49	4	intron	150									-	1	9	DNAJB12	NM_017626
#41	chr10	75673139	75673296	220	51	intron	157	Yes								+	5	10	PLAU	NM_001145031
#42	chr10	75830584	75830708	18	10	intron	124									+	3	22	VCL	NM_014000
#43	chr10	76781488	76781566	128	21	intron	78			SNORD172	snoRNA	0.75	3e-24	1	NR_145812.1	+	15	18	KAT6B	NM_001256469
#44	chr10	118640288	118640376	8	12	intron	88									+	13	14	ENO4	NM_001242699
#45	chr11	3943796	3943935	521	941	intron	139			SNORA7B	snoRNA	0.95	3e-43	0.89	NR_002992.2	+	1	13	STIM1	NM_001277962
#46	chr11	8107615	8107707	84	5	intron	92									+	1	12	TUB	NM_177972
#47	chr11	12788673	12788746	17	6	intron	73									+	3	13	TEAD1	NM_021961
#48	chr11	62608793	62609037	61	27	intron	244									-	1	12	WDR74	NM_018093
#49	chr11	103279250	103279391	63	38	intron	141									+	85	90	DYNC2H1	NM_001080463
#50	chr11	110122586	110122735	54	5	intron	149									-	9	16	RDX	NM_001260493
#51	chr11	119243299	119243380	335	119	intron	81									-	2	13	USP2	NM_004205
#52	chr11	119366339	119366392	523	125	intron	53									+	3	4	LOC100499227	NR_034160
#53	chr12	10775104	10775173	57	8	intron	69									-	9	11	STYK1	NM_018423
#54	chr12	50850324	50850594	7424	10652	intron	270		Yes	SNORD133	snoRNA	0.82	1e-113	1	NR_132753.1	+	10	11	LARP4	NM_001170804
#55	chr12	51125705	51125758	25	4	intron	53									+	31	38	DIP2B	NM_173602
#56	chr12	56641394	56641470	8	9	intron	76									-	19	28	ANKRD52	NM_173595
#57	chr12	104488557	104488627	87	34	intron	70	Yes								+	10	15	HCFC2	NM_013320
#58	chr12	106528990	106529195	12	35	intron	205		Yes							-	1	7	NUAK1	NM_014840
#59	chr12	112858456	112858634	42	35	intron	178		Yes							+	1	11	PTPN11	NM_080601
#60	chr12	116424503	116424574	20	1	intron	71									-	18	31	MED13L	NM_015335
#61	chr12	120574610	120574682	15	32	intron	72									-	50	58	GCN1L1	NM_006836
#62	chr12	123270496	123270639	45	42	intron	143									+	4	13	CCDC62	NM_201435
#63	chr12	124101241	124101394	4627	11400	intron	153		Yes	SNORA9	snoRNA	0.85	3e-64	1	NR_145743.1	+	10	14	DDX55	NM_020936
#64	chr12	132395681	132395800	37	12	intron	119									+	12	28	ULK1	NM_003565
#65	chr14	32911725	32911849	46447	31162	intron	124			RN7SL2	scRNA	0.96	3e-46	0.91	NR_027260.1	+	2	10	AKAP6	NM_004274
#66	chr14	32953532	32953718	165	76	intron	186									+	2	10	AKAP6	NM_004274
#67	chr14	32954005	32954148	1818	1337	intron	143									+	2	10	AKAP6	NM_004274
#68	chr14	36231967	36232164	6042	15262	intron	197		Yes	SNORA101B	snoRNA	0.67	7e-63	1	NR_135620.1	-	4	41	RALGAPA1	NM_014990
#69	chr14	45557439	45557519	24791	29780	intron	80			SNORD58B	snoRNA	0.8	3e-22	0.94	NR_002572.1	+	1	14	PRPF39	NM_017922
#70	chr14	50151267	50151365	311	330	intron	98			RNU6ATAC	RNU	0.98	2e-25	0.86	NR_023344.1	-	1	19	POLE2	NM_002692
#71	chr14	52054339	52054412	47	6	intron	73									-	1	3	FRMD6-AS2	NR_051990
#72	chr14	68935287	68935421	19	3	intron	134									+	10	11	RAD51B	NM_133510
#73	chr14	69414612	69414670	14	1	intron	58									-	1	21	ACTN1	NM_001130005
#74	chr14	90280468	90280562	21	5	intron	94									-	5	6	EFCAB11	NM_145231
#75	chr15	25453208	25453355	87	7431	intron	147			SNORD115-21	snoRNA	0.55	2e-36	1	NR_003313.1	+	1	2	SNORD115-15	NR_003313
#76	chr15	35083989	35084104	77	18	intron	115									-	5	7	ACTC1	NM_005159
#77	chr15	39880151	39880242	21	17	intron	91									+	8	22	THBS1	NM_003246
#78	chr15	39881287	39881402	116	150	intron	115									+	11	22	THBS1	NM_003246
#79	chr15	39883551	39883705	25	10	intron	154									+	15	22	THBS1	NM_003246
#80	chr15	39885428	39885597	136	30	intron	169	Yes								+	18	22	THBS1	NM_003246
#81	chr15	58921267	58921344	1	1	intron	77									-	9	16	ADAM10	NM_001110
#82	chr15	65577769	65577954	1077	1130	intron	185		Yes	SNORA24	snoRNA	0.7	3e-64	1	NR_145768.1	-	1	6	PARP16	NM_017851
#83	chr15	72503053	72503131	77	19	intron	78									-	3	10	PKM	NM_001206797
#84	chr15	99383473	99383527	40	9	intron	54									+	2	11	IGF1R	NM_000875
#85	chr16	2114051	2114182	21	10	intron	131									+	14	42	TSC2	NM_000548
#86	chr16	3827828	3827921	32	6	intron	93									-	10	31	CREBBP	NM_004380
#87	chr16	10845218	10845357	11	1	intron	139									+	3	11	NUBP1	NM_002484
#88	chr16	20749423	20749495	77	21	intron	72									-	2	5	THUMPD1	NM_017736
#89	chr16	46920332	46920402	46	6	intron	70			SNORD148	snoRNA	0.77	2e-21	1	NR_145840.1	+	2	12	GPT2	NM_001142466
#90	chr16	69392582	69392666	1361	1830	intron	84									-	8	10	TERF2	NM_005652
#91	chr16	70886600	70886688	102	108	intron	88			RNU6ATAC	RNU	0.89	1e-28	0.95	NR_023344.1	-	73	86	HYDIN	NM_001270974
#92	chr17	17634902	17634982	2	0	intron	80									+	2	6	RAI1	NM_030665
#93	chr17	19565322	19565403	152	375	intron	81			SNORA31	snoRNA	0.97	1e-21	0.89	NR_002967.1	+	6	11	ALDH3A2	NM_001031806
#94	chr17	21200707	21200858	47	3	intron	151									+	2	13	MAP2K3	NM_002756
#95	chr17	29159708	29159790	12	2	intron	82									+	1	23	ATAD5	NM_024857
#96	chr17	30986470	30986548	736	241	intron	78									-	16	22	MYO1D	NM_015194
#97	chr17	31149418	31149497	929	139	intron	79									-	1	22	MYO1D	NM_015194
#98	chr17	31149511	31149754	2198	425	intron	243									-	1	22	MYO1D	NM_015194
#99	chr17	37063042	37063205	55	30	intron	163		Yes	RN7SL3	scRNA	0.27	0.003	0.78	NR_145670.1	+	5	8	LASP1	NM_001271608
#100	chr17	40926086	40926157	17	7	intron	71									+	2	6	VPS25	NM_032353
#101	chr17	42156033	42156162	33	21	intron	129									-	25	27	HDAC5	NM_005474
#102	chr17	43508194	43508366	47	29	intron	172		Yes							-	3	4	ARHGAP27	NM_174919
#103	chr17	48152890	48152962	26	52	intron	72									+	11	26	ITGA3	NM_002204
#104	chr17	48273889	48273977	36	10	intron	88									-	12	51	COL1A1	NM_000088
#105	chr17	48275363	48275521	37	12	intron	158									-	7	51	COL1A1	NM_000088
#106	chr17	55951151	55951264	141	71	intron	113									-	3	11	CUEDC1	NM_001271875
#107	chr17	57915254	57915457	115	13	intron	203		Yes							+	10	12	VMP1	NM_030938
#108	chr17	65211850	65211940	543	140	intron	90									-	3	31	HELZ	NM_014877
#109	chr17	73775044	73775127	61	40	intron	83									-	2	4	H3F3B	NM_005324
#110	chr17	79478134	79478213	25	56	intron	79									-	4	7	ACTG1	NM_001614
#111	chr17	79573411	79573472	84	25	intron	61									-	7	17	NPLOC4	NM_017921
#112	chr17	80047827	80048014	36	63	intron	187			SNORD134	snoRNA	0.95	6e-90	1	NR_132755.1	-	11	43	FASN	NM_004104
#113	chr18	8339705	8339783	22	5	intron	78									+	22	33	PTPRM	NM_001105244
#114	chr18	19291955	19292081	104	218	intron	126			SNORA81	snoRNA	0.97	2e-40	0.89	NR_002989.1	+	1	21	MIB1	NM_020774
#115	chr18	19304079	19304188	60	75	intron	109			RNY3	Y RNA	1	9e-30	0.85	NR_004392.1	+	1	21	MIB1	NM_020774
#116	chr18	45379627	45379808	63	44	intron	181									-	6	11	SMAD2	NM_005901
#117	chr18	46769517	46769574	93	16	intron	57									-	13	17	DYM	NM_017653
#118	chr19	3457220	3457295	773	450	intron	75									+	10	11	NFIC	NM_205843
#119	chr19	3977035	3977116	177	28	intron	81									-	14	15	EEF2	NM_001961
#120	chr19	4376473	4376540	25	3	intron	67									-	1	10	SH3GL1	NM_001199944
#121	chr19	11333581	11333668	69	116	intron	87									-	11	34	DOCK6	NM_020812
#122	chr19	12814374	12814505	7089	2707	intron	131			SNORD135	snoRNA	0.57	6e-32	1	NR_132756.1	-	17	24	TNPO2	NM_013433
#123	chr19	17831545	17831628	39	7	intron	83									+	1	7	MAP1S	NM_018174
#124	chr19	33099234	33099378	4907	5700	intron	144		Yes	SNORA68B	snoRNA	0.92	4e-65	1	NR_145718.1	-	22	29	ANKRD27	NM_032139
#125	chr19	37814644	37814718	20	4	intron	74									+	3	6	HKR1	NM_181786
#126	chr19	55913953	55914026	70	10	intron	73			SNORD157	snoRNA	0.93	7e-30	1	NR_145781.1	-	3	4	UBE2S	NM_014501
#127	chr2	10295198	10295334	941	1328	intron	136		Yes	SNORA2A	snoRNA	0.97	2e-43	0.88	NR_002950.1	+	2	3	C2orf48	NM_182626
#128	chr2	25180399	25180461	49	4	intron	62									-	4	7	DNAJC27	NM_016544
#129	chr2	25467939	25468027	6227	1196	intron	88									-	9	19	DNMT3A	NM_153759
#130	chr2	71895243	71895346	1983	504	intron	103	Yes								+	47	55	DYSF	NM_001130980
#131	chr2	75290873	75290977	132	51	intron	104									-	2	5	TACR1	NM_001058
#132	chr2	85433246	85433331	33	24	intron	85									+	3	12	TCF7L1	NM_031283
#133	chr2	128750964	128751034	57	21	intron	70									-	6	15	SAP130	NM_024545
#134	chr2	135186257	135186315	34	3	intron	58									+	14	16	MGAT5	NM_002410
#135	chr2	135894161	135894353	1149	1939	intron	192		Yes	SNORA40B	snoRNA	0.66	2e-62	1	NR_145723.1	+	17	25	RAB3GAP1	NM_001172435
#136	chr2	161253373	161253459	298	73	intron	86			RMRP	MRP RNA	0.8	4e-26	0.96	NR_003051.3	-	1	14	RBMS1	NM_002897
#137	chr2	169088544	169088646	932	160	intron	102									-	1	18	STK39	NM_013233
#138	chr2	197550872	197551054	84	138	intron	182		Yes	SCARNA16	scaRNA	0.91	2e-61	0.9	NR_003013.1	+	13	28	CCDC150	NM_001080539
#139	chr2	218785879	218785946	10	7	intron	67									-	1	33	TNS1	NM_022648
#140	chr2	238432092	238432151	547	716	intron	59									+	6	12	MLPH	NM_001042467
#141	chr2	241495100	241495152	37	2	intron	52									-	1	3	ANKMY1	NM_017844
#142	chr2	242429541	242429604	15	10	intron	63									+	22	27	FARP2	NM_014808
#143	chr2	242651551	242651614	63	8	intron	63									+	5	6	ING5	NM_032329
#144	chr20	5102117	5102196	21	47	intron	79			SNORA26	snoRNA	0.86	7e-19	0.91	NR_003016.1	-	1	7	PCNA	NM_002592
#145	chr20	18591689	18591800	367	573	intron	111			RNU6ATAC	RNU	0.98	7e-36	0.88	NR_023344.1	+	3	6	DTD1	NM_080820
#146	chr20	21146941	21147102	79	5	intron	161									+	6	14	PLK1S1	NM_018474
#147	chr20	35425424	35425554	698	69	intron	130									-	12	15	SOGA1	NM_199181
#148	chr20	50318158	50318234	66	6	intron	76									-	4	28	ATP9A	NM_006045
#149	chr20	60466657	60466720	1	0	intron	63									+	7	16	CDH4	NM_001794
#150	chr20	62325561	62325634	9	0	intron	73									+	30	35	RTEL1	NM_032957
#151	chr20	62365855	62365928	273	60	intron	73									+	4	7	ZGPAT	NM_032527
#152	chr21	28212449	28212580	127	11	intron	131									-	5	9	ADAMTS1	NM_006988
#153	chr21	33692296	33692442	64	9	intron	146									-	35	39	URB1	NM_014825
#154	chr21	36165154	36165288	10	11	intron	134									-	5	6	RUNX1	NM_001001890
#155	chr21	46632442	46632567	42	5	intron	125									+	10	13	ADARB1	NM_015833
#156	chr21	47614007	47614073	22	10	intron	66			SNORD159	snoRNA	1	8e-29	1	NR_145780.1	-	20	23	LSS	NM_001001438
#157	chr22	18291831	18291932	23	10	intron	101									-	25	29	MICAL3	NM_015241
#158	chr22	25493286	25493345	32	23	intron	59									+	4	11	KIAA1671	NM_001145206
#159	chr22	29694975	29695104	16	10	intron	129									+	15	18	EWSR1	NM_013986
#160	chr22	39709735	39709949	35714	65169	intron	214			SNORA81	snoRNA	0.98	6e-39	0.89	NR_002989.1	-	7	10	RPL3	NM_001033853
#161	chr22	39711182	39711342	94194	144547	intron	160		Yes	SNORD83A	snoRNA	1	9e-43	1	NR_000028.1	-	5	10	RPL3	NM_001033853
#162	chr3	11630365	11630496	12	10	intron	131									-	2	5	VGLL4	NM_001128221
#163	chr3	12112789	12113255	113	3	intron	466		Yes	MIR539	miRNA	0.04	0.005	1	NR_030256.1	+	4	14	SYN2	NM_003178
#164	chr3	15679849	15680054	94	0	intron	205									+	2	4	BTD	NM_000060
#165	chr3	30660892	30661046	8	13	intron	154									+	1	8	TGFBR2	NM_001024847
#166	chr3	47703047	47703189	171	112	intron	142			SNORD146	snoRNA	0.91	1e-63	1	NR_145791.1	-	20	28	SMARCC1	NM_003074
#167	chr3	52524475	52524562	6	3	intron	87									+	18	21	NISCH	NM_007184
#168	chr3	52722883	52723080	61415	22579	intron	197		Yes	SNORD136	snoRNA	0.74	5e-71	1	NR_132757.1	+	5	15	GNL3	NM_014366
#169	chr3	58129518	58129603	13	2	intron	85									+	33	47	FLNB	NM_001164317
#170	chr3	89521398	89521518	31	5	intron	120									+	15	17	EPHA3	NM_182644
#171	chr3	100383936	100384325	22	1	intron	389		Yes							+	14	16	GPR128	NM_032787
#172	chr3	123532923	123533055	84	289	intron	132			SNORA5A	snoRNA	0.95	5e-40	0.89	NR_002919.1	-	3	34	MYLK	NM_053025
#173	chr3	134084868	134085080	82	24	intron	212		Yes							-	1	7	AMOTL2	NM_016201
#174	chr3	154877146	154877214	1	0	intron	68									+	16	23	MME	NM_007289
#175	chr3	177342063	177342201	40118	73669	intron	138			SNORA18	snoRNA	0.92	7e-44	0.91	NR_002959.1	+	2	4	LINC00578	NR_047568
#176	chr3	183169519	183169803	110	460	intron	284		Yes	SNORA63	snoRNA	0.4	3e-16	0.79	NR_033236.1	+	1	4	LINC00888	NR_038301
#177	chr3	183171508	183171744	650	1721	intron	236		Yes	SNORA63	snoRNA	0.78	2e-20	0.78	NR_033236.1	+	2	4	LINC00888	NR_038302
#178	chr3	186504154	186504247	223	294	intron	93			SNORA63B	snoRNA	0.87	7e-33	1	NR_145766.1	+	6	11	EIF4A2	NM_001967
#179	chr4	1112685	1112802	1023	1005	intron	117			SNORA48	snoRNA	0.97	4e-34	0.87	NR_002918.1	-	1	4	TMED11P	NR_033768
#180	chr4	1952637	1952701	41	8	intron	64									+	9	22	WHSC1	NM_001042424
#181	chr4	68612981	68613107	654	1040	intron	126			SNORA62	snoRNA	0.96	2e-37	0.89	NR_002324.1	-	1	3	GNRHR	NM_000406
#182	chr4	89127575	89127704	1682	2053	intron	129			RNU6ATAC	RNU	0.96	3e-45	0.91	NR_023344.1	-	1	16	ABCG2	NM_001257386
#183	chr4	93623082	93623282	27	11	intron	200									+	2	6	GRID2	NM_001510
#184	chr4	129002750	129002928	168	42	intron	178									+	4	9	LARP1B	NM_032239
#185	chr4	148888105	148888182	27	6	intron	77									+	18	23	ARHGAP10	NM_024605
#186	chr4	169392559	169392696	110	285	intron	137			SNORA51	snoRNA	0.95	2e-45	0.9	NR_002981.1	-	3	37	DDX60L	NM_001012967
#187	chr4	169532179	169532257	11	3	intron	78									+	2	22	PALLD	NM_001166108
#188	chr4	185561270	185561411	38	47	intron	141									-	2	8	CASP3	NM_004346
#189	chr5	387693	387808	173	16	intron	115									+	4	12	AHRR	NM_020731
#190	chr5	14422647	14422782	88	13	intron	135	Yes								+	34	57	TRIO	NM_007118
#191	chr5	14464085	14464185	309	34	intron	100			SNORD170	snoRNA	0.85	4e-39	1	NR_145815.1	+	36	57	TRIO	NM_007118
#192	chr5	15578495	15578562	173	234	intron	67									+	1	4	FBXL7	NM_012304
#193	chr5	32276441	32276590	103	121	intron	149									-	2	16	MTMR12	NM_001040446
#194	chr5	34830488	34830583	43	4	intron	95									+	17	18	RAI14	NM_015577
#195	chr5	74178452	74178606	113	199	intron	154		Yes	SNORA40	snoRNA	0.78	1e-41	0.92	NR_002973.1	-	2	13	FAM169A	NM_015566
#196	chr5	75469807	75469975	17	39	intron	168		Yes							+	2	13	SV2C	NM_014979
#197	chr5	79946866	79947375	493	627	intron	509		Yes							-	2	6	DHFR	NM_000791
#198	chr5	79947437	79947954	1235	425	intron	517		Yes	SNORA109	snoRNA	0.19	9e-30	0.89	NR_132964.1	-	2	6	DHFR	NM_000791
#199	chr5	79947576	79947880	30	12	intron	304		Yes							-	2	6	DHFR	NM_000791
#200	chr5	79947883	79947954	1235	425	intron	71									-	2	6	DHFR	NM_000791
#201	chr5	93906451	93906586	991	994	intron	135									-	2	21	KIAA0825	NM_001145678
#202	chr5	129310583	129310673	965	1167	intron	90			RNU6ATAC	RNU	0.88	2e-34	0.99	NR_023344.1	+	2	3	CHSY3	NM_175856
#203	chr5	129450095	129450190	195	110	intron	95			MIR7641-1	miRNA	0.58	4e-17	0.93	NR_106987.1	+	2	3	CHSY3	NM_175856
#204	chr5	134259390	134259562	23	7	intron	172									+	2	4	PCBD2	NM_032151
#205	chr5	134259730	134259894	52	57	intron	164		Yes							+	2	4	PCBD2	NM_032151
#206	chr5	134260830	134261419	24	8	intron	589		Yes							+	2	4	PCBD2	NM_032151
#207	chr5	134262155	134262348	2660	3577	intron	193			tRNA-like	tRNA					+	2	4	PCBD2	NM_032151
#208	chr5	134262500	134262763	635	601	intron	263		Yes							+	2	4	PCBD2	NM_032151
#209	chr5	134262765	134263000	25	10	intron	235		Yes							+	2	4	PCBD2	NM_032151
#210	chr5	139056879	139057041	38	22	intron	162									+	1	3	CXXC5	NM_016463
#211	chr5	141702808	141702949	8	3	intron	141		Yes							-	1	3	SPRY4	NM_030964
#212	chr5	159542164	159542241	64	9	intron	77									-	1	4	PWWP2A	NM_052927
#213	chr5	178635826	178635911	1076	75	intron	85									-	3	22	ADAMTS2	NM_014244
#214	chr5	179991593	179991674	9	11	intron	81									+	5	12	CNOT6	NM_015455
#215	chr6	609165	609253	162	55	intron	88									-	9	30	EXOC2	NM_018303
#216	chr6	15379147	15379210	10	3	intron	63									+	2	6	JARID2	NM_001267040
#217	chr6	26458697	26458753	26	5	intron	56									+	1	8	BTN2A1	NM_007049
#218	chr6	34383150	34383219	8	12	intron	69									-	5	9	RPS10-NUDT3	NM_001202470
#219	chr6	34389364	34389421	38	17	intron	57									-	4	9	RPS10-NUDT3	NM_001202470
#220	chr6	35619589	35619725	487	909	intron	136			SNORA40	snoRNA	0.8	2e-43	0.95	NR_002973.1	-	1	11	FKBP5	NM_001145776
#221	chr6	38175048	38175124	2068	2879	intron	76			SNORD45B	snoRNA	0.86	2e-23	0.94	NR_002748.1	-	9	11	BTBD9	NM_001172418
#222	chr6	41800605	41800734	851	400	intron	129			SNORA8	snoRNA	1	2e-37	0.88	NR_002920.1	-	3	7	USP49	NM_018561
#223	chr6	42036422	42036488	13	5	intron	66									+	7	9	TAF8	NM_138572
#224	chr6	43511879	43512007	128	310	intron	128			SCARNA15	scaRNA	0.99	1e-47	0.93	NR_003011.1	-	20	32	XPO5	NM_020750
#225	chr6	74228333	74228420	28	27	intron	87									-	4	7	EEF1A1	NM_001402
#226	chr6	75838420	75838502	4	1	intron	82			SNORD156	snoRNA	0.9	4e-33	1	NR_145788.1	-	36	65	COL12A1	NM_004370
#227	chr6	111169745	111169904	827	1574	intron	159		Yes	SNORA40	snoRNA	0.81	1e-46	0.92	NR_002973.1	+	1	9	AMD1	NM_001033059
#228	chr6	137176844	137176961	74	68	intron	117			SNORA27	snoRNA	1	2e-32	0.86	NR_002575.1	+	5	10	PEX7	NM_000288
#229	chr6	143770939	143771151	22	4	intron	212			MIR7641-2	miRNA	0.22	1e-16	0.98	NR_106988.1	-	1	6	ADAT2	NM_182503
#230	chr6	157297932	157298109	55	4	intron	177									+	5	20	ARID1B	NM_020732
#231	chr6	158744014	158744172	79	22	intron	158		Yes	SNORA116	snoRNA	0.92	3e-72	1	NR_145798.1	+	1	8	TULP4	NM_001007466
#232	chr7	6056485	6056670	458	511	intron	185		Yes	SNORA80B	snoRNA	0.72	6e-45	0.9	NR_028374.1	+	2	4	AIMP2	NM_006303
#233	chr7	39368586	39368736	20912	48638	intron	150		Yes	SNORA20	snoRNA	0.88	3e-49	0.92	NR_002960.1	+	5	11	POU6F2	NM_007252
#234	chr7	55581667	55581798	62	43	intron	131									-	2	5	VOPP1	NM_030796
#235	chr7	64530912	64531117	62	75	intron	205		Yes	SNORA15	snoRNA	0.65	4e-61	0.98	NR_002957.1	+	8	11	CCT6P3	NR_033416
#236	chr7	65225035	65225241	63	75	intron	206		Yes	SNORA15	snoRNA	0.65	4e-61	0.98	NR_002957.1	-	8	12	CCT6P1	NR_003110
#237	chr7	65616991	65617125	32	4	intron	134									+	6	7	CRCP	NR_024548
#238	chr7	73460863	73460952	44	4	intron	89									+	8	28	ELN	NM_001081752
#239	chr7	94056373	94056499	37	15	intron	126									+	47	52	COL1A2	NM_000089
#240	chr7	99697060	99697207	118	45	intron	147									-	3	14	MCM7	NM_182776
#241	chr7	143079778	143079893	122	81	intron	115			MIR6892	miRNA	1	1e-53	1	NR_106952.1	+	3	9	ZYX	NM_003461
#242	chr7	150763848	150763937	74	46	intron	89									+	6	23	SLC4A2	NM_001199692
#243	chr8	29975077	29975157	79	5	intron	80									+	3	4	LEPROTL1	NM_001128208
#244	chr8	56815252	56815416	252	402	intron	164		Yes	SNORA1	snoRNA	0.8	1e-55	0.95	NR_003026.1	+	1	13	LYN	NM_001111097
#245	chr8	118933091	118933152	61	8	intron	61			SNORD168	snoRNA	0.95	2e-24	1	NR_145799.1	-	1	11	EXT1	NM_000127
#246	chr8	131175217	131175338	258	447	intron	121			SNORA12	snoRNA	0.95	1e-35	0.89	NR_002954.1	-	4	24	ASAP1	NM_001247996
#247	chr8	144588276	144588425	144	44	intron	149			SNORD149	snoRNA	0.45	1e-27	1	NR_145785.1	-	4	12	ZC3H3	NM_015117
#248	chr8	145065972	145066045	124	34	intron	73			mml-MIR1230	miRNA	1	6e-21	0.89	NR_032305.1	+	3	7	GRINA	NM_001009184
#249	chr9	5096576	5096652	1182	687	intron	76									+	21	24	JAK2	NM_004972
#250	chr9	5109362	5109446	1081	1318	intron	84									+	21	24	JAK2	NM_004972
#251	chr9	16442644	16442707	23	2	intron	63									-	5	7	BNC2	NM_017637
#252	chr9	33868578	33868678	633	421	intron	100			RNU4ATAC	RNU	0.81	5e-21	0.88	NR_023343.1	+	1	5	UBE2R2	NM_017811
#253	chr9	96429583	96429642	7	1	intron	59									+	17	22	PHF2	NM_005392
#254	chr9	101011492	101011582	33	5	intron	90									-	2	13	TBC1D2	NM_018421
#255	chr9	131331635	131331722	790	80	intron	87									+	3	25	SPTAN1	NM_001195532
#256	chr9	132948140	132948221	5	10	intron	81									+	1	8	NCS1	NM_014286
#257	chr9	134916821	134916993	21	6	intron	172									-	2	8	MED27	NM_004269
#258	chr9	137583547	137583642	16	3	intron	95									+	2	66	COL5A1	NM_000093
#259	chrX	47335005	47335068	81	170	intron	63			SNORA51	snoRNA	0.9	2e-19	0.96	NR_002981.1	-	1	5	ZNF41	NM_153380
#260	chrX	54586736	54586802	27	2	intron	66									+	15	17	GNL3L	NM_019067
#261	chrX	74066845	74066977	61	129	intron	132			SCARNA27	scaRNA	0.93	1e-41	0.9	NR_003703.1	-	1	4	KIAA2022	NM_001008537
#262	chrX	135962367	135962458	23	3	intron	91									-	1	8	RBMX	NM_001164803
#263	chr1	566310	566441	1821	1337	intergenic	131									-
#264	chr1	566741	567151	237	110	intergenic	410		Yes							-
#265	chr1	567427	567633	143	31	intergenic	503									-
#266	chr1	567723	567919	105	39	intergenic	196		Yes	MIR6723	miRNA	0.35	2e-30	1	NR_106781.1	-
#267	chr1	568064	568836	117	53	intergenic	772		Yes							-
#268	chr1	568513	568806	101	44	intergenic	293		Yes							-
#269	chr1	101598707	101598903	206	473	intergenic	196		Yes	MIR6516	miRNA	0.38	1e-26	0.93	NR_106997.1	+
#270	chr1	108047756	108048036	71	4	intergenic	280		Yes							+
#271	chr1	118231241	118231367	489	823	intergenic	126		Yes	SNORA40	snoRNA	0.91	8e-41	0.91	NR_002973.1	-
#272	chr1	120904884	120905137	54	2	intergenic	253									-
#273	chr1	149223659	149224242	4936	4502	intergenic	583		Yes	U1 small nuclear 4	RNU	0.28	3e-82	1	NR_004421.1	-
#274	chr1	181391975	181392045	4657	6230	intergenic	70									-
#275	chr1	201947586	201947767	1765	2352	intergenic	181	Yes	Yes	SNORA70B	snoRNA	0.72	2e-55	0.95	NR_003707.2	+
#276	chr1	224052312	224052409	117	7	intergenic	97									-
#277	chr1	224367349	224367469	155	709	intergenic	120			SNORA72	snoRNA	0.92	4e-40	0.92	NR_002581.1	+
#278	chr1	235703187	235703271	25	39	intergenic	84									-
#279	chr10	20036682	20036757	132	243	intergenic	75									+
#280	chr10	36723458	36723551	2650	3678	intergenic	82									-
#281	chr10	36727577	36727744	272	778	intergenic	141	Yes	Yes	SNORA40	snoRNA	0.91	1e-50	0.93	NR_002973.1	+
#282	chr10	58355663	58355790	1230	673	intergenic	127			SNORD2	snoRNA	0.52	2e-17	0.87	NR_002587.1	-
#283	chr11	27261023	27261202	52	19	intergenic	179
#284	chr11	122322183	122322318	1497	1124	intergenic	135			RNU4ATAC	RNU	0.93	2e-40	0.88	NR_023343.1	+
#285	chr12	13124988	13125072	1530	823	intergenic	83			SNORD88C	snoRNA	0.95	4e-20	0.86	NR_003069.1	+
#286	chr12	22158770	22158854	265	84	intergenic	84									-
#287	chr12	42093111	42093193	106	222	intergenic	82									-
#288	chr12	64217801	64218088	60	1	intergenic	287		Yes	MIR7705	miRNA	0.19	6e-19	0.95	NR_106992.1	+
#289	chr12	84577134	84577229	943	1935	intergenic	95			SNORA3B	snoRNA	0.97	2e-29	0.88	NR_002977.1	-
#290	chr12	119326238	119326371	275	274	intergenic	133		Yes	SNORA38B	snoRNA	0.97	1e-51	0.93	NR_003706.2	-
#291	chr12	130800219	130800281	2208	3376	intergenic	62									-
#292	chr13	109931906	109932050	4	4	intergenic	144
#293	chr13	110076609	110076735	336	46	intergenic	126			SNORA109	snoRNA	0.8	6e-31	0.89	NR_132964.1	-
#294	chr14	23120311	23120499	38	8	intergenic	188		Yes							-
#295	chr14	75668795	75668870	108	53	intergenic	75			RNU4ATAC	RNU	0.82	2e-21	0.94	NR_023343.1	-
#296	chr14	84638855	84639010	361	86	intergenic	131		Yes							-
#297	chr15	45493374	45493627	424	191	intergenic	253		Yes							+
#298	chr15	45507139	45507233	204	616	intergenic	93			SNORA11D	snoRNA	0.95	5e-31	0.91	NR_003711.1	-
#299	chr15	46643853	46643941	136	406	intergenic	88			SNORD11	snoRNA	0.9	6e-25	0.9	NR_003031.1	-
#300	chr16	2846384	2846533	8494	15805	intergenic	149		Yes	SNORA3B	snoRNA	0.83	3e-39	0.86	NR_002977.1	-
#301	chr16	9136769	9136901	79	5	intergenic	132
#302	chr16	50091823	50092014	119	3	intergenic	191		Yes							-
#303	chr17	17146599	17146911	62	2	intergenic	312		Yes							-
#304	chr17	18965443	18965575	55	17	intergenic	132									-
#305	chr17	18967083	18967246	79	28	intergenic	163									-
#306	chr17	19504826	19505040	197	50	intergenic	214		Yes							-
#307	chr17	19506659	19506726	148	296	intergenic	67
#308	chr17	22020108	22020191	962	972	intergenic	77									-
#309	chr17	26349355	26349482	24	31	intergenic	127			SNORA70C	snoRNA	1	2e-35	0.84	NR_003708.4	-
#310	chr17	41092581	41092722	827	1507	intergenic	141		Yes	SNORA40	snoRNA	0.9	4e-51	0.94	NR_002973.1	-
#311	chr17	41438317	41438734	88	17	intergenic	417									-
#312	chr17	44998489	44998616	1010	1315	intergenic	127			RNU6ATAC	RNU	0.98	4e-54	0.96	NR_023344.1	+
#313	chr17	51183152	51183655	114	39	intergenic	503		Yes
#314	chr17	65267582	65267748	5779	4676	intergenic	166		Yes	SNORA8	snoRNA	0.83	1e-56	0.94	NR_002920.1	+
#315	chr18	7301017	7301151	271	230	intergenic	134		Yes	SNORA48	snoRNA	0.94	2e-42	0.89	NR_002918.1	-
#316	chr18	19710605	19710690	485	491	intergenic	85			RNU6ATAC	RNU	0.84	7e-26	0.94	NR_023344.1	-
#317	chr18	57491321	57491480	94	2	intergenic	159									+
#318	chr19	1021496	1021892	267	729	intergenic	396		Yes	U6 small nuclear 1	RNU	0.26	8e-51	1	NR_004394.1	+
#319	chr19	9930663	9930770	39	51	intergenic	107			SNORA70B	snoRNA	0.83	9e-34	0.93	NR_003707.2	+
#320	chr2	10436164	10436308	1757	3108	intergenic	144		Yes	SNORA51	snoRNA	0.93	6e-49	0.92	NR_002981.1	-
#321	chr2	18221861	18222002	473	883	intergenic	141		Yes	SNORA40	snoRNA	0.88	8e-47	0.92	NR_002973.1	-
#322	chr2	30410297	30410433	571	934	intergenic	136		Yes	SNORA10	snoRNA	0.97	4e-63	0.98	NR_002327.1	+
#323	chr2	38708941	38709217	153	4	intergenic	276		Yes							+
#324	chr2	44292574	44292905	52	1	intergenic	331		Yes	MIR7705	miRNA	0.17	1e-21	0.98	NR_106992.1	+
#325	chr2	53697580	53697767	142	408	intergenic	187		Yes	MIR6516	miRNA	0.4	4e-21	0.89	NR_106997.1	-
#326	chr2	108715993	108716188	115	3	intergenic	195									+
#327	chr2	131037737	131037796	236	269	intergenic	59									+
#328	chr2	143849007	143849079	45	6	intergenic	72									+
#329	chr2	143854200	143854257	354	568	intergenic	57									-
#330	chr2	215711654	215711849	1801	2270	intergenic	195		Yes	SNORA70C	snoRNA	0.69	2e-49	0.9	NR_003708.4	+
#331	chr20	43095151	43095349	118	4	intergenic	198	Yes								+
#332	chr21	33910326	33910399	1878	3021	intergenic	73			SNORA33	snoRNA	0.91	2e-24	0.94	NR_002436.1	-
#333	chr21	34214143	34214307	950	1212	intergenic	164		Yes	SNORA70B	snoRNA	0.81	2e-48	0.9	NR_003707.2	-
#334	chr22	38967030	38967161	97	83	intergenic	129									+
#335	chr3	32079014	32079103	283	327	intergenic	89			SNORA25	snoRNA	0.95	1e-31	0.93	NR_003028.1	+
#336	chr3	37009679	37009805	1048	1301	intergenic	126			RNU6ATAC	RNU	0.97	6e-52	0.95	NR_023344.1	-
#337	chr3	43270995	43271059	690	591	intergenic	64									+
#338	chr3	57605175	57605304	631	865	intergenic	129			RNU6ATAC	RNU	0.93	3e-50	0.95	NR_023344.1	+
#339	chr3	96336034	96336257	151	19	intergenic	223			MIR4485	miRNA	0.25	7e-18	0.93	NR_039705.1	-
#340	chr3	96336402	96337074	1142	300	intergenic	672		Yes							-
#341	chr3	96337079	96337360	465	623	intergenic	281	Yes	Yes							-
#342	chr3	112359993	112360160	31	17	intergenic	167									-
#343	chr3	139213829	139214203	120	2	intergenic	374		Yes							+
#344	chr3	160414715	160414854	383	1474	intergenic	139		Yes	SNORA72	snoRNA	0.94	9e-48	0.91	NR_002581.1	+
#345	chr4	17322360	17322506	6826	10511	intergenic	146		Yes	SNORA75	snoRNA	0.92	1e-51	0.92	NR_002921.1	-
#346	chr4	56194328	56194461	158	34	intergenic	133			SNORA109	snoRNA	0.7	3e-28	0.89	NR_132964.1	+
#347	chr4	73830896	73831035	3780	3600	intergenic	139			RNU4ATAC	RNU	0.9	4e-42	0.89	NR_023343.1	+
#348	chr4	73892464	73892593	1437	1765	intergenic	129			RNU6ATAC	RNU	0.96	5e-53	0.95	NR_023344.1	+
#349	chr4	83323790	83323859	1269	1448	intergenic	69			SNORD42B	snoRNA	0.84	2e-18	0.93	NR_000013.1	-
#350	chr4	104493246	104493348	51	2	intergenic	102									+
#351	chr4	106027196	106027253	435	452	intergenic	57			SNORA31	snoRNA	0.85	4e-07	0.84	NR_002967.1	+
#352	chr4	145126828	145126889	19	42	intergenic	61									-
#353	chr4	156376041	156376125	3492	4849	intergenic	84									-
#354	chr4	156385579	156385707	112	15	intergenic	128			MIR1973	miRNA	0.21	1e-07	1	NR_031737.1	-
#355	chr5	15452070	15452357	94	1	intergenic	287		Yes							+
#356	chr5	29070624	29070719	3000	3461	intergenic	95			SNORA18	snoRNA	0.91	6e-30	0.91	NR_002959.1	+
#357	chr5	72217639	72217707	23	6	intergenic	67	Yes	Yes							+
#358	chr5	99384495	99384688	2148	2847	intergenic	193	Database NAR M. Scott								-
#359	chr5	99385105	99385340	20	8	intergenic	235		Yes
#360	chr5	99386768	99386835	26	43	intergenic	67
#361	chr5	99389532	99389705	43	10	intergenic	173		Yes	MIR6723	miRNA	0.5	2e-30	0.92	NR_106781.1
#362	chr5	139959249	139959379	572	941	intergenic	130		Yes	SNORA27	snoRNA	0.94	2e-43	0.91	NR_002575.1	+
#363	chr5	170793119	170793283	1856	2336	intergenic	164			SNORA70C	snoRNA	0.82	4e-51	0.91	NR_003708.4	+
#364	chr6	10222268	10222392	310	391	intergenic	124			RNU6ATAC	RNU	0.95	9e-44	0.92	NR_023344.1	+
#365	chr6	95156836	95156908	97	176	intergenic	72									-
#366	chr6	109129913	109130099	10	30	intergenic	186		Yes							+
#367	chr6	156699884	156699956	62	12	intergenic	72			SNORD28B	snoRNA	1	2e-31	1	NR_145751.1	+
#368	chr6	160141443	160141570	99	84	intergenic	127			RNU4ATAC	RNU	0.99	2e-39	0.87	NR_023343.1	-
#369	chr7	57261841	57261909	4575	6531	intergenic	68									+
#370	chr7	64792305	64792395	1034	1882	intergenic	90			SNORA63	snoRNA	0.85	9e-29	0.95	NR_002586.1	+
#371	chr7	143009732	143010029	99	1	intergenic	297		Yes							-
#372	chr7	145694414	145694483	422	531	intergenic	69
#373	chr7	152306457	152306520	454	741	intergenic	63			SNORA26	snoRNA	0.98	2e-17	0.89	NR_003016.1	+
#374	chr8	8819083	8819218	470	605	intergenic	135		Yes	SNORA70B	snoRNA	0.97	2e-42	0.88	NR_003707.2	+
#375	chr8	23663796	23663890	37	29	intergenic	94			SNORA67	snoRNA	0.97	2e-29	0.9	NR_002912.1
#376	chr8	55435631	55435918	33	2	intergenic	287		Yes
#377	chr8	82067436	82067495	17	4	intergenic	59
#378	chr8	101752030	101752135	365	532	intergenic	104			RNU6ATAC	RNU	0.95	8e-32	0.89	NR_023344.1	-
#379	chr8	132445139	132445203	200	586	intergenic	64			SNORA72	snoRNA	0.98	2e-18	0.9	NR_002581.1	-
#380	chr8	134656830	134656971	740	1387	intergenic	141		Yes	SNORA40	snoRNA	0.91	3e-46	0.91	NR_002973.1	-
#381	chr9	26796224	26796304	144	131	intergenic	80			SNORA31B	snoRNA	0.93	3e-22	0.89	NR_145985.1	-
#382	chr9	27864978	27865163	14	53	intergenic	185		Yes							-
#383	chr9	33656682	33656777	100	27	intergenic	95									-
#384	chr9	81357660	81357728	95	193	intergenic	68									-
#385	chr9	134658246	134658309	67	56	intergenic	63			SNORA67	snoRNA	0.93	1e-18	0.92	NR_002912.1	-
#386	chrX	3450155	3450293	3313	2928	intergenic	138		Yes	SNORA48	snoRNA	0.94	7e-54	0.94	NR_002918.1	-
#387	chrX	39647156	39647459	150	1	intergenic	303		Yes							-
#388	chrX	46992069	46992233	96230	68286	intergenic	164			U12 small nuclear	RNU	0.93	2e-57	0.91	NR_029422.1	+
#389	chrX	53171003	53171393	141	2	intergenic	390		Yes							+
#390	chrX	80937851	80938020	161	3	intergenic	169		Yes							+
#391	chrX	86401734	86401811	2068	2755	intergenic	77			SNORD45B	snoRNA	0.92	8e-23	0.92	NR_002748.1	+
#392	chrX	123331595	123331700	10	35	intergenic	105			SNORA40	snoRNA	0.95	4e-32	0.89	NR_002973.1	+
#393	chrX	125606313	125606432	84	25	intergenic	119			MIR6723	miRNA	0.52	1e-20	0.94	NR_106781.1	+
#394	chrX	125606443	125606713	31	10	intergenic	270		Yes
#395	chrX	125715173	125715290	945	154	intergenic	117
#396	chrX	132286779	132286948	11333	9212	intergenic	158		Yes	SNORA8	snoRNA	0.86	4e-57	0.94	NR_002920.1	+
#397	chrX	138992085	138992194	5043	5797	intergenic	109			SNORA18	snoRNA	0.96	3e-34	0.89	NR_002959.1	+
#398	chrY	19868482	19868693	103	1	intergenic	211									-
#399	chrY	20311081	20311292	103	1	intergenic	211									+

## Sheet: Sheet2
$136	chr2	135894161	135894353	1149	1939	233	429	#106	intron	192		1.00 H/ACA	SNORA40B
$196	chr5	74178452	74178606	113	199	0	6	#158	intron	154			SNORA40
$221	chr6	35619589	35619725	487	909	2	26	#179	intron	136		0.55 H/ACA	SNORA40
$228	chr6	111169745	111169904	827	1574	1	61	#185	intron	159	-26.4	1.00 H/ACA	SNORA40
$272	chr1	118231241	118231367	489	823	0	0	#225	intergenic	126			SNORA40
$282	chr10	36727577	36727744	272	778	0	34	#235	intergenic	141		1.00 H/ACA	SNORA40
$311	chr17	41092581	41092722	827	1507	0	11	#262	intergenic	141		0.55 H/ACA	SNORA40
$322	chr2	18221861	18222002	473	883	0	10	#275	intergenic	141			SNORA40
$381	chr8	134656830	134656971	740	1387	0	2	#334	intergenic	141			SNORA40
$393	chrX	123331595	123331700	10	35	0	0	#348	intergenic	105			SNORA40
				5387	10034	236	579
			expression
			low	1er decile
			moderate	1 quartile
			high	3eme quartile
			high +	9eme decile
			high ++	1
