# Supplementary material for: Systematic Identification and Functional Validation of New snoRNAs in Human Muscle Progenitors
Source: Noncoding RNA. 2021 Sep 13;7(3):56. doi: 10.3390/ncrna7030056 (PMC8482216; doi:10.3390/ncrna7030056)
Supplement: Supplementary file 1 [file ncrna-07-00056-s001.zip › TableS3.xlsx]

## Sheet: global_expression_genes_cpm
	CPM
Gene	MB_rep1	MB_rep2	MT_rep1	MT_rep2
A1BG	3.5826	3.42107	2.72845	2.56082
A1BG-AS1	4.27673	4.53664	5.78822	5.43308
A1CF	0.0223913	0.0371856	0	0
A2M	0.0223913	0	0.0779558	0.207634
A2M-AS1	1.74652	2.00802	1.16934	1.45344
A2ML1	0	0	0	0
A2MP1	0	0	0	0
A3GALT2	0.0447825	0.0371856	0.0194889	0.103817
A4GALT	10.3224	10.0773	18.9043	17.199
A4GNT	0	0	0	0
AA06	0	0	0	0
AAAS	40.6625	40.0489	32.0398	32.114
AACS	21.406	22.4601	22.081	22.0438
AACSP1	0	0	0.0194889	0.0346056
AADAC	0	0	0	0
AADACL2	0	0	0	0
AADACL2-AS1	0	0	0.0194889	0
AADACL3	0	0	0	0
AADACL4	0	0	0.0389779	0.0346056
AADACP1	0	0	0	0
AADAT	12.9645	13.4984	14.2269	13.7038
AAED1	10.188	9.37077	10.2512	10.9354
AAGAB	64.6659	61.9884	72.0117	73.9522
AAK1	78.9516	77.0857	63.1052	62.8092
AAMDC	10.8598	11.7135	4.2291	4.67176
AAMP	89.1844	87.6092	120.831	116.033
AANAT	0.0447825	0	0.0389779	0.0346056
AAR2	39.9236	39.1936	52.5617	50.7319
AARD	0.313478	0.446227	0.0974447	0.207634
AARS	146.461	146.065	255.909	260.027
AARS2	26.0634	28.261	13.6033	14.7074
AARSD1	20.0612	22.0399	25.8377	23.6851
AASDH	12.6511	12.6803	12.2391	12.4926
AASDHPPT	45.5662	46.7423	55.7774	52.4621
AASS	15.0021	15.6179	70.9398	72.9833
AATBC	0	0	0.0389779	0
AATF	47.7382	46.8166	45.0974	45.5756
AATK	0.313478	0.185928	0.526202	0.761324
AATK-AS1	0	0	0	0
ABALON	0	0	0.0584668	0.0346056
ABAT	28.6384	29.3766	35.1776	36.4051
ABCA1	5.14999	6.02406	22.2759	20.8672
ABCA10	0	0	0	0
ABCA11P	6.95159	7.58586	7.65779	7.26718
ABCA12	0.783694	0.594969	0.136423	0.276845
ABCA13	7.20998	7.69741	12.4339	12.4926
ABCA17P	0.291086	0.632155	0.272845	0.588296
ABCA2	43.4166	41.9081	81.8731	79.766
ABCA3	1.81369	2.30551	51.0416	47.652
ABCA4	0.268695	0.111557	0.409268	0.173028
ABCA5	0.0671738	0.185928	0.155912	0.0346056
ABCA6	0	0	0	0
ABCA7	29.1534	26.5133	51.3339	47.4789
ABCA8	0	0	0	0
ABCA9	0	0	0	0
ABCA9-AS1	0	0	0	0
ABCB1	0	0	0	0
ABCB10	31.3478	32.2771	26.0567	24.5354
ABCB11	0	0	0	0
ABCB4	0	0.0371856	0.0779558	0.173028
ABCB5	0.0447825	0	0.0584668	0.0346056
ABCB6	45.5214	45.7011	58.8177	56.4764
ABCB7	20.376	19.5596	18.8848	20.5211
ABCB8	78.6381	76.342	71.8947	68.5884
ABCB9	3.02282	3.38389	3.50801	3.49517
ABCC1	77.4737	78.1269	46.9684	48.4133
ABCC10	30.3849	28.1123	26.1737	27.1308
ABCC11	0.089565	0.148742	0.0389779	0.0346056
ABCC12	0.0223913	0.148742	0.448246	0.692113
ABCC13	0	0	0	0
ABCC2	2.32869	1.97084	1.07189	1.28041
ABCC3	30.2058	29.5253	13.5058	13.9115
ABCC4	33.878	34.3967	36.0156	37.824
ABCC5	36.856	37.0368	51.7237	51.3202
ABCC5-AS1	0	0	0	0
ABCC6	0.470216	0.223113	0.0584668	0.207634
ABCC6P1	0	0	0	0
ABCC6P2	0.0671738	0.0371856	0.0194889	0.0346056
ABCC8	0	0	0	0
ABCC9	2.75412	3.56982	0.350801	0.276845
ABCD1	21.7643	20.5264	52.055	46.0255
ABCD2	0	0	0	0
ABCD3	87.0348	86.5308	57.3365	58.8642
ABCD4	25.5036	23.9475	26.7778	26.8886
ABCE1	149.977	146.102	128.432	128.837
ABCF1	95.5211	97.984	91.4616	93.7813
ABCF2	124.249	120.407	177.583	175.208
ABCF3	50.0892	49.2709	53.0879	52.8774
ABCG1	0	0	0	0
ABCG2	1.90326	1.89646	2.86488	3.0799
ABCG4	0.425434	0.297485	0.0584668	0.103817
ABCG5	0	0	0	0
ABCG8	0	0	0	0
ABHD1	0.0447825	0.0371856	0.0389779	0
ABHD10	37.9532	36.8509	23.4062	21.2479
ABHD11	18.7639	19.3365	12.2391	11.6275
ABHD11-AS1	0.246304	0.260299	0.233867	0.276845
ABHD12	39.0503	39.8629	24.2637	25.1237
ABHD12B	0	0	0	0.0346056
ABHD13	18.4728	17.9234	24.712	25.1929
ABHD14A	10.2171	11.1401	9.1793	8.96286
ABHD14A-ACY1	0.359827	0.486015	0	0
ABHD14B	33.3854	34.2851	26.2126	25.2967
ABHD15	14.0841	13.424	9.68601	10.4163
ABHD16A	25.6156	25.1746	47.2802	45.8871
ABHD16B	0.0223913	0	0	0
ABHD17A	45.7005	44.3624	42.9342	39.6581
ABHD17B	13.1661	13.1637	15.5912	15.7802
ABHD17C	17.4428	18.2209	35.0996	31.0413
ABHD2	247.401	247.879	314.493	319.825
ABHD3	5.91129	5.83814	3.07925	2.97608
ABHD4	44.7601	42.7634	60.1234	62.3594
ABHD5	45.4095	42.7262	23.0164	22.3552
ABHD6	3.87369	3.79293	3.62494	3.80662
ABHD8	14.5543	14.428	19.6254	18.3756
ABI1	66.2781	68.9049	56.7713	57.3415
ABI2	82.467	84.1138	70.511	73.4332
ABI3	0.089565	0.371856	0.0194889	0
ABI3BP	179.869	185.593	311.57	319.894
ABL1	249.685	248.4	150.396	142.783
ABL2	163.837	162.501	208.746	207.634
ABLIM1	25.7723	27.2198	54.9393	54.5385
ABLIM2	0.0223913	0	0.877003	1.17659
ABLIM3	83.5418	83.5932	314.688	318.13
ABO	0	0	0	0.0346056
ABR	121.271	121.82	109.099	107.866
ABRA	0	0	0.194889	0.346056
ABRACL	20.7343	18.8531	7.38631	7.371
ABT1	23.9362	25.1746	20.7168	18.9293
ABTB1	15.7634	15.4692	40.4201	38.0662
ABTB2	9.00128	8.2552	28.9216	27.2
ACAA1	38.4682	38.0037	37.5552	36.1629
ACAA2	95.7674	103.413	94.5214	94.8194
ACACA	90.7294	91.0675	159.692	162.439
ACACB	7.4339	6.50748	6.33391	7.33639
ACAD10	14.5991	14.8742	20.8727	19.7598
ACAD11	24.0804	26.2552	48.3646	51.1343
ACAD8	17.5995	18.4069	28.8631	31.2489
ACAD9	54.5003	53.8075	45	45.0911
ACADL	0.0223913	0.0743712	0.116934	0.0346056
ACADM	34.9527	38.5986	40.4785	43.084
ACADS	8.08324	7.10244	7.24989	6.71349
ACADSB	19.6371	19.2249	33.3846	33.7059
ACADVL	337.459	337.608	235.485	235.837
ACAN	0.649346	0.520598	0	0
ACAP1	0.223913	0.223113	0.155912	0.173028
ACAP2	63.927	61.6909	48.8588	50.8357
ACAP3	91.3787	86.6052	97.815	91.9472
ACAT1	66.5916	66.4506	55.641	52.8428
ACAT2	65.069	64.7401	129.582	127.556
ACBD3	69.4353	69.537	66.4768	65.6469
ACBD4	2.95565	3.49544	8.04894	7.68245
ACBD5	64.9346	65.1863	52.7566	55.4036
ACBD6	41.6925	40.1232	40.3031	39.8657
ACBD7	8.97889	10.6723	1.55912	1.38423
ACCS	13.278	12.7918	17.1113	17.372
ACCSL	0	0	0.0194889	0
ACD	17.1293	16.5476	7.54222	7.02494
ACE	0.156739	0.185928	0.194889	0.276845
ACE2	0.0223913	0	0.0194889	0.0346056
ACER1	0	0	0	0.0346056
ACER2	1.58978	1.89646	0.954959	0.968958
ACER3	28.0115	26.2902	20.1711	19.3099
ACHE	0.268695	0.148742	19.6254	22.4591
ACIN1	214.262	213.111	173.101	176.108
ACKR1	0	0	0	0
ACKR2	0	0.0743712	0	0.0346056
ACKR3	20.3313	20.2661	5.35946	5.39848
ACKR4	0.0447825	0	0.214378	0.0692113
ACLY	353.849	361.035	309.718	317.299
ACMSD	0.0223913	0	0	0.0346056
ACO1	95.4763	94.2654	94.5409	95.6846
ACO2	75.4809	77.2344	103.194	103.575
ACOT1	3.60499	3.68137	5.98311	5.74454
ACOT11	21.2045	20.8239	93.6444	89.8708
ACOT12	0.0223913	0.0371856	0	0
ACOT13	23.8691	24.8028	24.1468	21.9054
ACOT2	18.2041	18.2581	27.3235	27.2692
ACOT4	0.313478	0.409041	0.155912	0.0692113
ACOT6	0	0	0	0
ACOT7	51.4775	54.105	58.4474	55.5074
ACOT8	10.5239	11.1929	9.47163	9.37813
ACOT9	62.8746	60.2778	59.7531	61.6672
ACOX1	41.894	41.0901	50.9441	51.5624
ACOX2	0.291086	0.148742	0.233867	0.103817
ACOX3	18.025	17.031	27.4599	27.7191
ACOXL	0.0447825	0	0.0974447	0.207634
ACP1	73.712	74.334	58.272	58.8988
ACP2	37.9084	35.1032	35.5284	36.7858
ACP5	0.17913	0.0371856	0.136423	0.173028
ACP6	7.1652	7.43712	6.68471	7.12876
ACPP	0.0223913	0	0	0.0346056
ACPT	0	0	0	0
ACR	0	0	0	0
ACRBP	0.089565	0.148742	0.116934	0.103817
ACRC	1.92565	1.45024	2.72845	4.18728
ACRV1	0.111956	0.111557	0.0194889	0.0346056
ACSBG1	0.0223913	0	0.623646	0.622901
ACSBG2	0	0	0	0
ACSF2	14.7558	15.0973	12.0052	11.316
ACSF3	7.45629	8.21801	12.8042	12.3196
ACSL1	30.4297	28.5213	118.902	122.193
ACSL3	215.74	215.862	433.161	431.913
ACSL4	206.492	206.454	210.89	222.653
ACSL5	0.134348	0.185928	1.42269	1.62646
ACSL6	0.0447825	0.0743712	0.545691	0.830535
ACSM1	0	0	0	0
ACSM2A	0	0	0	0
ACSM2B	0	0	0	0
ACSM3	0.134348	0.111557	0.0779558	0.0692113
ACSM4	0	0	0	0
ACSM5	1.32108	1.45024	1.85145	2.04173
ACSM6	0	0	0	0
ACSS1	0.470216	0.371856	2.74794	3.49517
ACSS2	17.286	17.1426	27.0702	27.6845
ACSS3	0.313478	0.33467	0.292334	0.622901
ACTA1	0.0223913	0	463.934	450.565
ACTA2	79.9592	83.4072	1420.76	1452.36
ACTA2-AS1	0	0.0371856	0.0584668	0.103817
ACTB	6582.16	6671.91	3053.7	3091.32
ACTBL2	0	0.0371856	0	0
ACTC1	4596.25	4606.74	12362.5	12475
ACTG1	3949.21	3791	1355.5	1310.93
ACTG1P17	0.0447825	0.185928	0.0584668	0
ACTG1P20	2.23913	1.97084	2.45561	2.69924
ACTG1P4	0.111956	0.0743712	0.487224	0.519085
ACTG2	0.492608	0.33467	0.0584668	0.0692113
ACTL10	0.0223913	0	0.0194889	0
ACTL6A	93.058	99.3227	28.9021	29.1726
ACTL6B	0	0	0	0
ACTL7A	0	0	0	0
ACTL7B	0	0	0	0
ACTL8	0.0447825	0	0	0
ACTL9	0	0	0	0
ACTN1	599.011	587.867	605.541	617.157
ACTN1-AS1	0.0223913	0.0743712	0.0974447	0.103817
ACTN2	0.0223913	0	72.7717	74.9558
ACTN3	0	0	0	0
ACTN4	846.68	839.167	941.92	933.003
ACTR10	84.3255	82.0686	70.9788	71.4952
ACTR1A	209.694	213.111	215.899	215.178
ACTR1B	75.772	72.8465	89.4738	88.3828
ACTR2	507.274	523.908	281.713	289.926
ACTR3	347.535	357.614	296.193	306.191
ACTR3B	12.8526	11.9738	14.987	14.6036
ACTR3BP2	0	0	0	0
ACTR3BP5	0	0	0	0
ACTR3C	0.0223913	0.0371856	0.0974447	0.0346056
ACTR5	7.09803	7.54867	9.91988	11.0392
ACTR6	22.436	23.836	20.249	18.9985
ACTR8	37.6845	40.3092	41.9792	43.7069
ACTRT1	0	0	0	0
ACTRT2	0	0	0	0
ACTRT3	2.75412	3.71856	2.10481	2.14555
ACVR1	63.0314	63.0296	81.3469	80.3543
ACVR1B	17.3756	18.444	20.8532	21.7323
ACVR1C	6.11281	7.51149	10.2707	10.6585
ACVR2A	7.72498	6.99089	18.1247	19.3099
ACVR2B	9.20281	8.32957	6.62624	8.16693
ACVR2B-AS1	0.35826	0.743712	0.311823	0.242239
ACVRL1	0	0	0	0
ACY1	17.076	18.2343	21.5353	20.6596
ACY3	0	0	0.116934	0.0692113
ACYP1	9.11324	8.73861	3.56648	3.7028
ACYP2	4.99325	3.607	12.9212	11.5929
ADA	5.50825	5.76376	6.178	5.43308
ADAD1	0	0	0	0
ADAD2	0	0	0	0
ADAL	23.8691	23.9847	26.2906	26.3695
ADAM10	158.194	160.047	335.171	339.343
ADAM11	0.470216	0.594969	0.448246	0.276845
ADAM12	449.012	442.657	147.687	150.535
ADAM15	82.0639	75.7098	48.1572	43.2917
ADAM17	60.1205	59.906	99.8809	100.149
ADAM18	0	0	0	0
ADAM19	412.469	418.077	378.807	390.732
ADAM1A	3.38108	3.01203	4.38501	4.18728
ADAM2	0	0	0	0
ADAM20	0.0447825	0.0743712	0.116934	0.173028
ADAM20P1	0.291086	0.446227	1.0524	0.899747
ADAM21	0.89565	0.818083	0.604157	0.588296
ADAM21P1	0.156739	0.0371856	0.0779558	0
ADAM22	0.268695	0.297485	0.136423	0.138423
ADAM23	10.2328	10.3748	26.7778	25.9542
ADAM28	5.84412	6.39592	2.04634	2.04173
ADAM29	0	0	0	0
ADAM30	0	0	0	0
ADAM32	0.313478	0.632155	0.311823	0.276845
ADAM33	0.35826	0.409041	0.214378	0.173028
ADAM3A	0	0	0	0
ADAM5	0	0	0	0
ADAM6	0	0	0	0
ADAM7	0	0.0371856	0	0
ADAM8	1.07478	1.15275	2.22174	2.04173
ADAM9	544.846	567.675	181.345	190.227
ADAMDEC1	0	0	0.0389779	0.103817
ADAMTS1	428.278	426.295	149.207	148.943
ADAMTS10	0.828476	0.446227	1.26678	0.692113
ADAMTS12	41.1103	37.4459	79.5539	78.5202
ADAMTS13	2.75412	2.15676	5.26202	5.26006
ADAMTS14	13.7258	11.6019	36.9121	35.8168
ADAMTS15	6.89651	7.43712	12.6094	10.4163
ADAMTS16	8.77737	9.70544	2.02685	2.38779
ADAMTS17	0.0223913	0.111557	0.272845	0.173028
ADAMTS18	0	0.0371856	0.0194889	0.0692113
ADAMTS19	0	0	0	0
ADAMTS19-AS1	0	0	0	0
ADAMTS2	171.763	169.417	126.62	126.38
ADAMTS20	0.89565	1.15275	0.194889	0.588296
ADAMTS3	0.17913	0.0743712	0.0779558	0.103817
ADAMTS4	24.5184	23.0551	26.8753	26.4041
ADAMTS5	318.896	320.428	381.691	388.31
ADAMTS6	66.4125	73.9621	28.5513	26.854
ADAMTS7	109.448	103.748	101.187	98.3838
ADAMTS7P1	0.0447825	0.0743712	0.214378	0.0346056
ADAMTS8	0	0	0.116934	0.0346056
ADAMTS9	0.335869	0.409041	4.69684	4.49873
ADAMTS9-AS1	0	0	0	0
ADAMTS9-AS2	0.0671738	0.0743712	0.0584668	0.103817
ADAMTSL1	184.817	185.891	180.487	177.735
ADAMTSL2	0.246304	0.297485	15.786	13.0463
ADAMTSL3	4.79173	4.20197	0.448246	0.346056
ADAMTSL4	9.13563	8.62705	30.5782	30.1415
ADAMTSL4-AS1	0.0671738	0.0743712	0.292334	0.276845
ADAMTSL5	8.1952	7.10244	14.4998	15.3303
ADAP1	0.582173	0.409041	0.136423	0.0346056
ADAP2	0.223913	0.371856	0.428757	0.242239
ADAR	259.156	258.44	175.42	178.323
ADARB1	123.667	122.526	112.451	112.814
ADARB2	0	0	0	0
ADARB2-AS1	0	0	0	0
ADAT1	33.8332	33.9132	19.1187	19.6906
ADAT2	8.66542	9.07328	16.4292	17.2682
ADAT3	3.71695	2.97485	4.03421	3.39135
ADCK1	4.27673	5.13161	7.48376	7.371
ADCK2	16.256	16.2501	14.4803	13.7384
ADCK3	10.1208	9.92855	15.0455	13.6692
ADCK4	20.6223	22.6832	38.1009	37.1318
ADCK5	10.4791	10.1888	20.9116	19.3792
ADCY1	1.25391	1.15275	1.34474	1.2112
ADCY10	0.134348	0.111557	0.136423	0.173028
ADCY10P1	0.985663	1.07838	2.02685	1.97391
ADCY2	0	0.0743712	0.0194889	0.0346056
ADCY3	14.1737	13.7215	9.5301	9.828
ADCY4	0	0	0	0
ADCY5	0.313478	0.148742	0.389779	0.692113
ADCY6	70.9803	73.7762	94.8332	93.8159
ADCY7	164.553	161.571	42.0572	41.8036
ADCY8	0.0223913	0.0371856	0.0779558	0.173028
ADCY9	48.3427	49.3824	62.8129	62.3248
ADCYAP1	0	0	0	0
ADCYAP1R1	0	0	0	0
ADD1	272.546	276.066	184.151	187.424
ADD2	0	0	0	0
ADD3	195.834	201.62	98.9454	100.183
ADD3-AS1	0.246304	0.223113	0.136423	0.0346056
ADGB	0	0	0	0
ADGRA1	0	0	1.94889	2.35318
ADGRA1-AS1	0	0	0	0.0346056
ADGRA2	4.14238	3.94167	5.26202	4.98321
ADGRA3	89.1172	89.8775	132.155	135.585
ADGRB1	0	0.0371856	0.0194889	0.0692113
ADGRB2	33.9004	29.1907	31.7475	30.0377
ADGRB3	0.0223913	0	0.116934	0.0346056
ADGRD1	0	0	0	0
ADGRE1	1.03	1.11557	0.643135	0.449873
ADGRE2	0	0	0	0
ADGRE3	0	0	0	0
ADGRE4P	0	0	0	0
ADGRE5	47.9845	46.1845	41.6284	44.6067
ADGRF1	0	0	0	0
ADGRF2	0.156739	0.148742	0.0389779	0
ADGRF3	0.201521	0.260299	0.116934	0.207634
ADGRF4	1.34348	0.706526	0.0974447	0.173028
ADGRF5	0.0223913	0.0371856	0.0389779	0.0346056
ADGRG1	47.2232	48.2669	136.929	137.903
ADGRG2	0.335869	0.185928	0.0389779	0.0692113
ADGRG3	0.0447825	0	0	0
ADGRG4	0	0	0	0
ADGRG5	0	0	0	0
ADGRG6	6.00086	5.46628	1.98787	1.73028
ADGRG7	0	0	0	0
ADGRL1	0.335869	0.409041	1.63707	1.66107
ADGRL2	0.223913	0.297485	1.38372	0.79593
ADGRL3	0	0	0	0
ADGRL3-AS1	0	0	0	0
ADGRL4	0.0447825	0	0	0
ADGRV1	0.0447825	0	0.0389779	0
ADH1A	0	0	0	0
ADH1B	0	0	0	0
ADH1C	0	0	0.0194889	0.0346056
ADH4	0	0	0	0
ADH5	144.804	144.354	151.039	151.988
ADH6	0	0	0	0
ADH7	0	0	0.0194889	0
ADHFE1	0.918041	0.892454	4.03421	3.52977
ADI1	122.749	124.534	68.1529	70.3533
ADIG	0	0	0	0
ADIPOQ	0	0	0	0
ADIPOQ-AS1	0	0	0	0
ADIPOR1	73.1298	74.0737	121.124	126.38
ADIPOR2	80.4518	81.2133	81.113	78.2433
ADIRF	0.850868	0.520598	0.526202	0.415268
ADK	47.044	46.6679	68.7375	67.1003
ADM	17.7115	17.1054	17.0333	16.057
ADM2	0.35826	0.111557	0.56518	0.449873
ADM5	1.38826	1.52461	1.44218	1.34962
ADNP	119.413	118.51	94.2875	94.335
ADNP-AS1	0.783694	1.11557	0.643135	0.519085
ADNP2	33.878	34.7685	26.4855	25.6082
ADO	44.0436	44.2136	48.547	48.3787
ADORA1	45.6782	45.9614	219.309	226.528
ADORA2A	0.83385	0.266249	0.596557	1.49427
ADORA2A-AS1	0.0671738	0.0743712	0.311823	0.207634
ADORA2B	5.19477	5.50347	2.24123	1.69568
ADORA3	0	0	0	0
ADPGK	72.0327	71.1732	45.5847	42.6687
ADPGK-AS1	0.0223913	0.0371856	0	0
ADPRH	40.058	39.677	32.7025	32.91
ADPRHL1	3.00043	3.01203	2.80641	2.94148
ADPRHL2	27.1382	26.6249	31.7865	30.4876
ADPRM	4.36629	4.72257	10.4071	9.17049
ADRA1A	0	0	0	0
ADRA1B	3.0676	2.78892	4.7553	4.53334
ADRA1D	0	0	0	0
ADRA2A	2.93325	2.93766	1.90992	1.73028
ADRA2B	0.0671738	0.111557	0.136423	0.0692113
ADRA2C	65.6288	64.4054	11.9272	10.9008
ADRB1	0	0	0	0
ADRB2	3.22434	2.90047	6.43135	6.47125
ADRB3	0	0	0	0
ADRBK1	66.8603	65.8185	102.59	97.934
ADRBK2	13.1437	13.3124	10.9333	11.4199
ADRM1	87.9528	85.6756	95.5738	93.4698
ADSL	76.4213	78.0525	80.7817	84.7146
ADSS	63.8599	60.6869	36.2105	34.9863
ADSSL1	3.51543	3.04922	5.45691	5.81375
ADTRP	1.2763	1.56179	0.272845	0.346056
AEBP1	0.380651	0.855268	2.72845	2.87227
AEBP2	31.7284	30.8268	35.0996	36.8204
AEN	49.4623	46.1101	24.5951	25.2275
AES	196.797	195.113	215.645	201.82
AFAP1	166.054	161.237	173.159	175.693
AFAP1-AS1	0.0223913	0	0	0
AFAP1L1	11.8226	12.2341	106.293	105.928
AFAP1L2	0.492608	0.409041	13.2915	13.4962
AFF1	29.8028	30.4178	41.7258	40.0733
AFF2	19.3013	19.1878	23.4647	25.3313
AFF3	0.0671738	0.0371856	0	0.103817
AFF4	201.432	199.203	251.057	247.223
AFG3L1P	11.5315	10.1517	11.2841	11.8351
AFG3L2	64.8675	67.6034	75.2663	73.3639
AFM	0	0	0	0
AFMID	9.80737	9.70544	7.89302	8.33996
AFP	1.50021	1.37587	0.467735	0.622901
AFTPH	28.5936	28.0007	20.8142	22.7359
AGA	10.6582	10.8582	5.41793	5.74454
AGAP1	29.8699	30.3434	45.4093	45.0219
AGAP1-IT1	0.0447825	0	0.0389779	0.0346056
AGAP11	0.291086	0.33467	0.760069	1.17659
AGAP2	0.53739	0.446227	28.7462	27.3385
AGAP2-AS1	21.2269	21.2701	15.5132	15.5379
AGAP3	71.8087	66.2647	186.197	179.43
AGAP4	1.7913	2.49143	2.78692	2.457
AGAP5	2.86608	2.93766	6.25595	5.84835
AGAP6	8.53107	8.36675	14.7336	16.3685
AGAP7P	0.223913	0.260299	0.467735	0.346056
AGAP9	0.761303	0.66934	0.584668	1.10738
AGBL1	0	0.0371856	0.292334	0.138423
AGBL1-AS1	0	0	0	0
AGBL2	0.246304	0.446227	0.292334	0.484479
AGBL3	0.313478	0.409041	0.604157	0.79593
AGBL4	0	0	0	0.0346056
AGBL4-IT1	0	0	0	0
AGBL5	47.1112	46.9654	21.5353	23.5664
AGBL5-AS1	0	0.0371856	0.0194889	0
AGER	3.00043	2.52862	3.5275	3.18372
AGFG1	90.5278	91.9971	122.371	118.005
AGFG2	12.8078	11.825	6.82113	6.60968
AGGF1	54.7914	56.8939	45.6041	47.1675
AGK	30.8999	35.1776	29.4868	32.2178
AGL	24.8543	25.0631	35.6063	38.5507
AGMAT	1.65695	1.78491	0.877003	0.588296
AGMO	0	0	0	0
AGO1	48.4771	48.899	36.5808	36.5782
AGO2	17.4652	16.7707	21.964	23.5318
AGO3	12.1361	10.4863	11.7908	12.6311
AGO4	32.1538	31.9052	33.6769	35.2977
AGPAT1	66.8379	67.3059	62.4231	62.7054
AGPAT2	21.518	21.233	23.6596	21.0748
AGPAT3	61.2177	58.7532	82.4967	83.0535
AGPAT4	23.6452	24.5053	27.4794	27.5461
AGPAT4-IT1	1.05239	0.818083	0.526202	0.588296
AGPAT5	68.3157	66.2647	208.688	205.211
AGPS	140.707	147.887	106.468	109.146
AGR2	0	0.0371856	0.0194889	0
AGR3	0	0	0	0
AGRN	119.233	111.408	343.649	320.171
AGRP	0	0	0	0
AGT	1.90326	1.56179	9.12083	8.47838
AGTPBP1	2.95565	3.49544	3.97575	3.97965
AGTR1	6.49346	5.68939	4.73581	5.15624
AGTR2	0	0	0	0
AGTRAP	16.6143	16.436	14.2464	16.1954
AGXT	0	0	0	0
AGXT2	0	0	0	0
AHCTF1	94.8046	95.2323	68.0749	68.2769
AHCTF1P1	0.962824	0.929639	0.682113	0.622901
AHCY	107.926	105.049	117.869	113.022
AHCYL1	168.158	172.839	143.945	144.444
AHCYL2	24.8991	25.1003	46.8709	45.7833
AHDC1	131.862	125.39	174.602	159.532
AHI1	56.5603	58.4185	81.8731	82.4998
AHNAK	2573.94	2684.43	1780.06	1880.23
AHNAK2	254.499	251.932	967.763	1014.46
AHR	49.7981	48.5272	75.2468	79.2123
AHRR	46.4842	43.284	86.2191	83.6418
AHSA1	97.1109	93.782	104.461	101.048
AHSA2	80.2055	81.4736	111.691	109.146
AHSG	0	0	0	0
AHSP	0	0	0	0
AICDA	0.0223913	0.0371856	0.0974447	0.103817
AIDA	76.287	77.7179	44.162	43.8453
AIF1	0	0	0	0
AIF1L	0.111956	0.0371856	52.4058	52.7044
AIFM1	29.3549	31.2359	35.314	35.8514
AIFM2	16.771	16.8823	38.783	38.4123
AIFM3	0.0223913	0.0371856	0	0
AIG1	58.2844	58.307	53.5751	56.7186
AIM1	250.245	250.147	25.589	27.2
AIM1L	0	0	0	0
AIM2	0.0223913	0	0	0
AIMP1	52.8881	50.6839	59.7336	59.3487
AIMP2	34.6393	34.7685	36.5028	34.9171
AIP	46.1484	44.6599	40.0888	38.4815
AIPL1	0	0	0	0
AIRE	0.35826	0.409041	39.5041	38.343
AIRN	0	0	0	0
AJAP1	0	0	0	0
AJUBA	199.349	187.155	247.705	237.81
AK1	81.0563	79.3168	204.595	201.024
AK2	138.49	142.495	123.268	126.518
AK3	75.9063	81.4736	83.0619	86.1334
AK4	35.0647	33.6158	10.9918	11.143
AK5	118.517	122.936	117.129	117.832
AK6	26.4772	26.5646	22.9291	21.5475
AK7	0	0.0371856	0.0779558	0.207634
AK8	0.0671738	0.0371856	0.116934	0.138423
AK9	4.97086	5.28035	10.4656	10.0356
AKAP1	21.4284	22.0139	44.1425	44.6759
AKAP10	33.0495	34.8429	31.806	30.4184
AKAP11	110.366	112.226	93.1767	92.1202
AKAP12	27.3397	27.4801	10.4266	10.97
AKAP13	101.88	101.665	229.287	226.009
AKAP14	0	0.0743712	0	0
AKAP17A	8.93411	7.9949	14.8896	13.773
AKAP2	259.014	265.425	119.758	117.285
AKAP3	0.783694	0.929639	0.760069	0.968958
AKAP4	0	0	0	0
AKAP5	3.5826	2.97485	0.857514	1.07277
AKAP6	12.0689	12.7918	74.0385	73.71
AKAP7	9.13563	10.1888	12.0247	11.1776
AKAP8	34.0347	33.3926	39.0364	38.9313
AKAP8L	39.7221	38.3011	68.4452	68.0001
AKAP9	143.483	144.726	497.397	495.899
AKIP1	35.7812	35.066	47.2022	47.4443
AKIRIN1	56.0677	54.6256	58.0576	54.5385
AKIRIN2	37.886	38.5614	36.7756	38.9659
AKNA	3.71695	3.90449	2.68948	2.457
AKNAD1	0.0671738	0.111557	0.818536	0.830535
AKR1A1	39.2071	34.7685	50.6518	50.7319
AKR1B1	322.613	326.601	166.416	174.17
AKR1B10	5.17238	6.02406	10.4071	10.7277
AKR1B15	0.940433	0.855268	0.838025	1.10738
AKR1C1	37.3038	36.9996	42.408	44.1914
AKR1C2	13.9274	11.5275	21.0286	20.1751
AKR1C3	26.0634	27.1455	54.647	54.2962
AKR1C4	0	0	0	0
AKR1C6P	0	0	0	0
AKR1C8P	0.0223913	0.0371856	0	0
AKR1D1	0	0	0	0
AKR1E2	0	0.111557	0	0
AKR7A2	74.2046	78.8706	35.9571	33.9827
AKR7A2P1	0	0	0	0
AKR7A3	0.738911	0.780897	0.428757	0.484479
AKR7L	0.671738	0.706526	0.779558	0.276845
AKT1	213.321	210.359	180.682	180.676
AKT1S1	52.9553	52.3573	55.3291	53.4657
AKT2	121.338	117.432	126.522	126.484
AKT3	81.2579	80.5068	62.5011	62.2555
AKTIP	18.7415	18.8903	24.4002	23.7741
ALAD	60.8146	63.4758	68.6596	71.426
ALAS1	37.5725	39.7514	43.3239	45.7833
ALAS2	0	0	0	0
ALB	0	0	0.0389779	0.0346056
ALCAM	302.64	312.21	80.6843	79.6968
ALDH16A1	29.0862	26.848	15.7276	15.0188
ALDH18A1	99.2828	104.603	94.3655	94.7502
ALDH1A1	118.338	118.139	129.251	125.342
ALDH1A2	0.53739	0.446227	9.3547	9.13589
ALDH1A3	0	0	0	0.0346056
ALDH1B1	144.491	148.333	333.339	328.754
ALDH1L1	0.156739	0.297485	0.0974447	0.173028
ALDH1L1-AS1	0	0	0	0
ALDH1L1-AS2	0	0	0	0
ALDH1L2	57.2544	58.2698	76.4746	79.9044
ALDH2	5.41868	4.79694	2.66999	2.80306
ALDH3A1	0.0223913	0.0371856	0.604157	0.484479
ALDH3A2	57.0753	55.4437	90.1559	89.3864
ALDH3B1	61.8223	59.7944	47.7674	48.5863
ALDH3B2	0.0223913	0	0.0389779	0
ALDH4A1	23.5108	23.7988	24.8484	24.6046
ALDH5A1	7.12042	5.54065	7.99047	8.06311
ALDH6A1	16.6367	16.4732	18.2611	18.8601
ALDH7A1	103.134	107.689	52.5422	53.7426
ALDH8A1	0.111956	0.0371856	0.760069	0.519085
ALDH9A1	97.4243	94.1911	87.1546	85.7528
ALDOA	972.071	986.161	824.402	836.211
ALDOB	0	0	0	0
ALDOC	2.06	1.85928	0.779558	0.934352
ALG1	25.6156	26.3646	23.3673	24.8815
ALG10	10.6358	9.96573	3.91728	4.01425
ALG10B	15.4724	15.2461	19.0407	20.2097
ALG11	13.8532	15.7897	21.5955	20.6734
ALG12	22.0106	20.638	33.2481	31.4565
ALG13	28.4593	28.8188	40.6734	42.6687
ALG14	10.4791	10.7466	7.81507	7.75166
ALG1L	0	0.0743712	0.0389779	0
ALG1L2	0.0223913	0.0371856	0	0
ALG1L9P	0.0447825	0	0.0779558	0.103817
ALG2	30.273	30.4922	30.1884	31.7334
ALG3	23.6004	22.051	23.0749	24.0163
ALG5	20.2641	19.4109	30.4807	28.7573
ALG6	15.9874	14.7255	8.24383	9.34352
ALG8	45.4095	45.9986	36.4054	37.824
ALG9	43.7301	44.6971	30.1884	28.5843
ALK	2.59739	2.8261	0.136423	0.346056
ALKBH1	10.3	11.0813	8.71156	8.5822
ALKBH2	8.79976	9.29639	9.93936	10.0356
ALKBH3	16.4128	15.4692	15.5327	15.0188
ALKBH3-AS1	0	0	0	0
ALKBH4	14.3752	14.7627	15.2988	14.569
ALKBH5	121.54	120.742	142.757	138.388
ALKBH6	6.6502	6.4331	7.24989	6.71349
ALKBH7	21.9658	19.3365	21.0286	18.9985
ALKBH8	17.6667	17.8491	14.987	16.2646
ALLC	0	0	0	0
ALMS1	65.8751	73.4787	39.6795	42.2189
ALMS1-IT1	0.35826	0.446227	0.0974447	0.0346056
ALMS1P	0	0	0.155912	0.103817
ALOX12	0	0	0	0
ALOX12-AS1	0.514999	0.446227	0.467735	0.899747
ALOX12B	0	0	0.0779558	0.0692113
ALOX12P2	0	0	0	0
ALOX15	0	0	0	0
ALOX15B	0	0	0	0
ALOX15P1	0.0223913	0.0371856	0	0
ALOX5	0.0223913	0.0371856	0	0
ALOX5AP	1.14195	0.855268	0.311823	0.346056
ALOXE3	0	0.0371856	0	0
ALPI	0	0	0	0
ALPK1	29.6908	28.6701	35.8792	36.9588
ALPK2	176.913	179.458	211.786	211.683
ALPK3	250.401	241.074	729.725	723.638
ALPL	6.06803	7.06526	4.61888	4.60255
ALPP	0.0223913	0	0	0
ALPPL2	0.0447825	0.111557	0	0
ALS2	64.3301	64.8888	98.3023	100.079
ALS2CL	4.27673	3.79293	13.1356	13.8423
ALS2CR11	2.23913	1.89646	1.11087	1.2112
ALS2CR12	0.403043	0.371856	1.75401	2.28397
ALX1	0	0	0	0
ALX3	0	0	0.0389779	0
ALX4	0.0671738	0.0371856	0	0
ALYREF	111.8	107.132	45.4872	44.399
AMACR	26.5377	25.41	22.4458	22.113
AMBN	0	0	0	0
AMBP	0.111956	0.148742	0.136423	0.173028
AMBRA1	25.8843	26.0299	28.1615	29.5186
AMD1	127.048	129.964	107.17	103.471
AMDHD1	0.156739	0.0743712	0.116934	0.103817
AMDHD2	14.3752	11.9366	11.8883	11.8697
AMELX	0	0	0	0
AMELY	0	0	0	0
AMER1	9.20281	9.33358	11.5569	11.0392
AMER2	0	0	0	0
AMER3	0	0	0	0
AMFR	83.2283	83.2957	96.3144	93.0892
AMH	13.0541	12.3456	7.24989	6.92113
AMHR2	0	0	0	0
AMICA1	0	0	0	0
AMIGO1	0.111956	0.0371856	0.175401	0.0692113
AMIGO2	428.793	423.544	130.654	127.487
AMIGO3	8.26237	7.84616	8.1074	8.47838
AMMECR1	24.9215	24.8028	33.1702	32.9446
AMMECR1L	40.7745	41.4247	40.6929	41.0077
AMN	0	0	0.0779558	0.0346056
AMN1	7.4115	7.9949	8.77003	7.54403
AMOT	0	0	0	0
AMOTL1	88.8485	90.4725	188.322	190.227
AMOTL2	214.083	208.723	225.818	219.85
AMPD1	0.0223913	0.0371856	4.5799	5.12163
AMPD2	60.5459	60.315	125.294	124.996
AMPD3	17.5324	17.626	12.1221	11.1084
AMPH	0.0447825	0	0	0
AMT	3.2942	2.79115	5.51167	5.72308
AMTN	0.313478	0.223113	0	0
AMY1A	0	0	0	0
AMY1B	0	0	0	0
AMY1C	0	0	0	0
AMY2A	0	0	0	0
AMY2B	1.56739	1.3015	4.63837	5.5023
AMZ1	0.626955	0.557784	0.0389779	0.103817
AMZ2	81.84	84.3741	87.2325	82.223
AMZ2P1	8.82215	7.92053	17.0723	15.4687
ANAPC1	63.009	61.8024	45.0779	47.0637
ANAPC10	9.94172	10.412	10.4656	10.8316
ANAPC11	73.9359	68.3471	52.055	46.3716
ANAPC13	90.5502	91.1418	101.966	104.959
ANAPC15	34.7512	33.7645	15.065	13.8076
ANAPC16	51.6118	52.4317	59.6947	62.394
ANAPC1P1	0	0	0	0
ANAPC2	33.3406	31.868	41.5504	41.4922
ANAPC4	37.5725	38.2268	29.6232	28.2382
ANAPC5	110.859	115.201	116.291	111.949
ANAPC7	75.0555	74.4083	66.126	65.2316
ANG	3.22501	3.64121	1.60453	1.20877
ANGEL1	17.286	17.4028	30.6171	29.8301
ANGEL2	34.2138	33.5414	27.8692	27.8229
ANGPT1	13.8826	13.7587	12.6873	11.0046
ANGPT2	0	0	0.0389779	0
ANGPT4	0.268695	0.223113	0	0
ANGPTL1	0.0447825	0.111557	0.56518	0.519085
ANGPTL2	281.973	279.412	148.584	149.773
ANGPTL3	0	0	0	0
ANGPTL4	2.21673	1.71054	0	0.103817
ANGPTL5	0	0	0	0
ANGPTL6	0.156739	0	0.214378	0.242239
ANGPTL7	0.134348	0.148742	1.5786	2.11094
ANHX	0	0	0	0
ANK1	6.26955	5.94969	84.5431	82.6729
ANK2	11.2628	10.1145	125.236	125.722
ANK3	5.21716	5.28035	11.0502	11.5929
ANKAR	2.39586	2.23113	1.90992	2.66463
ANKDD1A	2.93325	2.97485	5.72975	5.5369
ANKDD1B	0.0447825	0.148742	0.0974447	0.0692113
ANKEF1	0	0	0	0
ANKFN1	0.0223913	0	0	0
ANKFY1	118.741	119.923	103.545	103.436
ANKH	30.3625	30.4178	33.443	31.7334
ANKHD1	62.277	70.9333	59.7155	58.6254
ANKHD1-EIF4EBP3	47.8136	40.2887	65.6787	66.9546
ANKIB1	171.83	169.789	111.886	115.79
ANKK1	0.0671738	0.0371856	0.350801	0.311451
ANKLE1	0.806085	1.0412	0.974447	0.79593
ANKLE2	141.737	140.078	84.1728	84.0225
ANKMY1	8.1952	7.39993	8.00996	8.6168
ANKMY2	59.807	61.6165	34.8657	35.7476
ANKRA2	13.7482	14.3536	16.1174	14.9842
ANKRD1	143.662	142.16	1965.58	1974.25
ANKRD10	42.1627	41.5363	680.632	679.897
ANKRD11	139.184	134.351	111.906	106.412
ANKRD12	79.8248	78.2756	116.174	116.586
ANKRD13A	270.621	273.649	70.2577	70.111
ANKRD13B	6.58303	6.73059	12.4339	13.3232
ANKRD13C	35.5797	33.3926	35.4894	34.6748
ANKRD13D	18.316	17.0682	23.6791	22.113
ANKRD16	5.46347	4.68538	7.09398	6.88652
ANKRD17	142.968	151.197	155.502	159.117
ANKRD18A	4.16477	4.16478	3.58597	3.7028
ANKRD18B	8.62063	9.59388	20.7168	19.2407
ANKRD18DP	0	0	0	0
ANKRD19P	0	0	0.0389779	0.0346056
ANKRD2	0.156739	0.0371856	25.0238	24.3278
ANKRD20A1	0	0.0371856	0	0.0346056
ANKRD20A11P	0	0	0	0
ANKRD20A12P	0.873259	0.743712	0.506713	0.865141
ANKRD20A19P	0.0223913	0	0	0.0346056
ANKRD20A2	0	0	0	0
ANKRD20A3	0	0	0	0
ANKRD20A4	0	0	0	0
ANKRD20A5P	2.57499	3.16077	8.02945	8.54759
ANKRD20A8P	0	0	0	0
ANKRD20A9P	0.0447825	0.0371856	0.233867	0.276845
ANKRD22	0.0223913	0.0371856	0.136423	0.0692113
ANKRD23	1.99282	1.78491	3.64443	2.97608
ANKRD24	0.492608	0.33467	0.506713	0.484479
ANKRD26	35.7364	37.5574	26.9142	25.6428
ANKRD26P1	0.0447825	0.148742	0.0584668	0
ANKRD26P3	0	0	0	0
ANKRD27	35.0871	34.5082	26.2906	25.6082
ANKRD28	200.872	206.529	141.509	141.295
ANKRD29	1.545	1.63617	2.8259	2.66463
ANKRD30A	0	0	0	0
ANKRD30B	10.0313	10.1517	3.23517	4.42952
ANKRD30BL	0	0	0	0
ANKRD30BP2	0	0	0	0
ANKRD30BP3	0	0	0.0194889	0
ANKRD31	0	0.111557	0.0584668	0
ANKRD33	0	0	0	0
ANKRD33B	3.22434	3.16077	9.23776	8.23614
ANKRD34A	2.32869	2.67736	17.8129	18.5486
ANKRD34B	0	0	0	0
ANKRD34C	0.0223913	0	0.0584668	0.0346056
ANKRD34C-AS1	0	0	0.0194889	0
ANKRD35	0.850868	0.892454	0.857514	0.657507
ANKRD36	12.36	13.3124	11.8493	11.4891
ANKRD36B	8.41911	9.29639	8.06843	7.75166
ANKRD36BP1	0	0	0	0
ANKRD36BP2	0	0	0	0
ANKRD36C	17.1517	18.7043	10.9528	13.3232
ANKRD37	5.46347	6.47029	2.37765	2.28397
ANKRD39	5.6202	4.49945	6.39238	7.05955
ANKRD40	61.2625	61.9512	62.5595	64.055
ANKRD42	7.52346	8.44113	9.51061	10.797
ANKRD44	16.1665	16.5104	39.3287	39.6581
ANKRD44-IT1	0	0	0.0194889	0
ANKRD45	0.201521	0.148742	0.194889	0.276845
ANKRD46	6.6502	7.02807	8.55565	8.96286
ANKRD49	8.53107	8.36675	8.16587	8.68601
ANKRD50	58.1277	58.6045	58.8371	60.11
ANKRD52	364.44	360.328	258.131	257.224
ANKRD53	0.0223913	0.185928	0.0389779	0.0692113
ANKRD54	23.1749	25.2862	15.825	15.884
ANKRD55	0	0	0	0
ANKRD6	0.0223913	0.111557	0.0194889	0
ANKRD60	0	0	0	0
ANKRD61	0.156739	0.223113	0.136423	0.276845
ANKRD62	0	0.0371856	0	0
ANKRD62P1-PARP4P3	0	0	0	0
ANKRD63	0	0	0	0
ANKRD65	0.0447825	0	0	0
ANKRD66	0	0	0.0194889	0
ANKRD7	1.52261	0.892454	0.662624	0.519085
ANKRD9	11.7778	8.55268	10.0173	9.62037
ANKS1A	37.3038	34.7313	296.895	301.207
ANKS1B	0.0447825	0.0371856	0.194889	0.207634
ANKS3	10.703	11.3788	17.4816	17.3374
ANKS4B	0	0.0371856	0	0
ANKS6	29.1758	26.4018	29.019	28.4458
ANKUB1	0	0	0.0194889	0.0346056
ANKZF1	27.0486	27.8148	23.8155	21.8016
ANLN	1069.41	1084.52	127.964	128.041
ANO1	0	0	0	0
ANO1-AS2	0	0	0	0
ANO10	52.3508	53.2126	37.3798	37.0626
ANO2	0.918041	0.371856	14.7726	15.5033
ANO3	0	0	0	0.0346056
ANO4	1.14195	1.22712	0.116934	0.0346056
ANO5	0	0	0	0
ANO6	157.276	160.567	170.977	175.589
ANO7	0.71652	0.632155	0.0974447	0.0346056
ANO8	15.3156	15.7295	22.2174	21.6631
ANO9	0	0	0	0
ANOS1	0	0	0	0
ANP32A	100.895	104.417	67.2369	67.654
ANP32A-IT1	0.626955	0.780897	0.799047	0.79593
ANP32AP1	0.0223913	0.0371856	0.0194889	0.0346056
ANP32B	170.8	166.145	84.4066	81.6347
ANP32C	0	0.0743712	0.0194889	0.0346056
ANP32D	0	0	0	0
ANP32E	231.727	239.103	45.1754	48.967
ANPEP	133.206	128.997	38.2568	34.3288
ANTXR1	794.33	803.58	718.558	732.705
ANTXR2	178.212	175.925	288.534	296.847
ANTXRL	0.0223913	0	0	0
ANTXRLP1	0	0	0	0
ANXA1	657.318	662.015	295.297	292.21
ANXA10	0.604564	0.33467	0.0194889	0
ANXA11	71.9431	73.8506	185.067	183.825
ANXA13	0	0	0.136423	0.0346056
ANXA2	2711.69	2720.27	872.014	887.6
ANXA2P1	0.17913	0.148742	0.0584668	0.0346056
ANXA2P2	12.2256	8.66424	3.83932	2.04173
ANXA2P3	0.0223913	0	0	0
ANXA2R	1.63456	1.41305	0.877003	0.692113
ANXA3	2.75412	2.52862	1.13036	1.52265
ANXA4	72.9731	74.2596	41.5115	39.7273
ANXA5	1158.68	1160.97	498.099	503.166
ANXA6	746.524	746.426	923.562	925.839
ANXA7	165.203	168.19	144.082	155.137
ANXA8	0.582173	0.446227	0	0
ANXA8L1	1.34348	1.07838	0	0.0346056
ANXA9	0.111956	0.111557	0.0779558	0
AOAH	0	0	0	0
AOAH-IT1	0	0	0	0
AOC1	0	0	0.0194889	0.0346056
AOC2	0.425434	0.446227	0.428757	0.207634
AOC3	0.223913	0.111557	1.32525	1.38423
AOC4P	0	0	0	0
AOX1	56.4707	58.0839	13.0381	12.5618
AOX2P	0	0.0371856	0	0
AP1AR	17.0174	16.6963	20.5414	20.798
AP1B1	95.2076	88.4645	76.2992	75.0596
AP1B1P1	0	0	0	0
AP1G1	144.021	147.143	144.55	143.267
AP1G2	11.9121	10.8954	10.602	11.2122
AP1M1	102.865	100.029	57.7458	55.7843
AP1M2	0.447825	0.706526	0.155912	0.207634
AP1S1	79.1979	82.4032	23.8155	24.6738
AP1S2	34.2362	37.5202	19.1381	20.7634
AP1S3	1.88087	2.41706	0.799047	1.07277
AP2A1	145.386	136.248	95.2425	94.0581
AP2A2	87.8409	81.9942	68.6985	68.623
AP2B1	306.917	312.47	205.979	213.69
AP2M1	567.417	559.085	233.517	231.512
AP2S1	96.3272	91.9971	48.6834	43.4301
AP3B1	107.03	109.66	126.912	127.972
AP3B2	0.089565	0	0.0584668	0.138423
AP3D1	187.661	186.523	232.308	224.556
AP3M1	74.0031	73.0325	101.615	102.917
AP3M2	34.3482	34.8801	51.7432	53.9502
AP3S1	83.8329	86.9399	60.0455	58.968
AP3S2	43.8125	39.8403	63.596	69.0808
AP4B1	21.4732	23.0922	21.3599	22.286
AP4B1-AS1	0	0.0371856	0	0
AP4E1	54.5451	53.7332	48.2157	51.2163
AP4M1	26.4217	25.9927	23.0749	22.1822
AP4S1	8.15042	8.88735	10.4461	9.96642
AP5B1	35.2438	33.058	26.7778	25.9196
AP5M1	38.9384	40.8298	34.5344	35.0209
AP5S1	18.7639	18.9275	16.9164	17.372
AP5Z1	46.0364	44.6227	54.0429	50.9741
APAF1	48.7234	50.089	21.0481	22.5283
APBA1	11.7778	11.4903	7.62018	7.30179
APBA2	0	0	0	0
APBA3	11.6658	10.226	15.3183	14.7766
APBB1	17.8458	16.3245	16.1174	15.1573
APBB1IP	0.0223913	0	0	0
APBB2	73.4209	75.5983	57.6288	57.0647
APBB3	15.1141	14.7627	20.6388	18.7909
APC	67.0618	65.3351	72.5379	74.3675
APC2	0.335869	0.409041	0.877003	1.31501
APCDD1	10.2776	9.89136	8.06843	7.16337
APCDD1L	15.6963	15.0602	2.04634	1.73028
APCDD1L-AS1	1.2763	1.3015	0.214378	0.311451
APCS	0	0	0	0
APEH	78.9292	78.945	71.8363	70.8031
APELA	0	0	0.0779558	0.0692113
APEX1	175.279	174.549	154.937	155.275
APEX2	23.8691	23.0551	15.5522	15.2611
APH1A	145.185	142.421	111.126	109.734
APH1B	40.573	40.272	34.5539	34.2596
API5	106.65	106.871	84.738	85.0953
APIP	15.7411	17.8491	13.4864	12.6311
APITD1	15.6316	17.8558	5.74671	6.48371
APITD1-CORT	1.1059	1.33236	0.283174	0.285496
APLF	6.22477	5.50347	5.63231	6.09059
APLN	14.42	14.837	1.89043	2.11094
APLNR	0	0	0.0389779	0.0346056
APLP1	13.9721	14.428	2.49459	2.31858
APLP2	139.789	139.148	108.865	111.915
APMAP	133.944	132.306	78.0727	80.3543
APOA1	0.0447825	0.0371856	0.0584668	0
APOA1-AS	0	0	0	0
APOA1BP	32.6912	31.1615	21.7886	22.5629
APOA2	0	0	0	0
APOA4	0	0	0	0
APOA5	0	0	0	0.0346056
APOB	0.0223913	0	0	0
APOBEC1	0	0	0	0
APOBEC2	0.0671738	0.0743712	11.6544	11.2814
APOBEC3A	0	0	0	0
APOBEC3A_B	0	0	0	0
APOBEC3B	33.4301	33.8017	1.44218	1.2458
APOBEC3B-AS1	0	0	0	0
APOBEC3C	25.8171	25.6952	7.26938	8.20154
APOBEC3D	0.134348	0.0743712	0.175401	0.103817
APOBEC3F	2.01521	2.11958	1.18883	0.865141
APOBEC3G	1.76891	1.67335	1.71503	2.38779
APOBEC3H	0.0223913	0	0	0
APOBEC4	0	0	0	0
APOBR	0.111956	0.0371856	0.0974447	0.0346056
APOC1	0.0223913	0.0371856	0.272845	0.173028
APOC1P1	0	0	0.0389779	0.0692113
APOC2	0	0	0	0
APOC3	0	0	0	0
APOC4	0	0	0	0
APOC4-APOC2	0	0	0	0
APOD	0	0	0.0389779	0.0346056
APOE	0.71652	0.66934	111.477	104.371
APOF	0	0	0	0
APOH	0	0.0743712	0	0
APOL1	5.91129	6.17281	9.90039	10.2433
APOL2	27.4741	28.6701	28.0251	29.2418
APOL3	1.03	0.929639	3.68341	4.11807
APOL4	0.111956	0.0371856	1.73452	1.34962
APOL5	0	0	0.350801	0.242239
APOL6	17.8458	17.5516	33.6769	34.9517
APOLD1	18.2265	18.9275	7.54222	6.92113
APOM	1.88087	2.26832	1.52014	1.41883
APOO	12.4048	11.5275	10.4851	10.3471
APOOL	21.7867	21.7907	34.4175	32.91
APOOP5	0	0	0	0
APOPT1	25.5036	26.6621	23.6791	22.7359
APP	768.602	772.307	2071.07	2107.34
APPBP2	53.0673	57.0055	70.7059	74.0215
APPL1	70.219	71.3963	54.3547	52.8774
APPL2	97.178	97.9096	60.0455	56.7878
APRT	69.0994	63.0296	57.0442	54.1232
APTR	5.44107	5.80095	8.67258	8.5822
APTX	26.668	27.9636	25.0238	24.8815
AQP1	0.559781	0.632155	2.55305	2.56082
AQP10	0	0	0	0
AQP11	2.8213	2.93766	2.59203	2.04173
AQP12A	0	0	0	0
AQP12B	0	0	0	0
AQP2	0	0	0.0194889	0.0346056
AQP3	12.763	12.7547	160.94	159.117
AQP4	0	0	0	0
AQP4-AS1	0	0	0	0
AQP5	0.0223913	0	1.2278	0.79593
AQP6	0	0.0371856	0.389779	0.449873
AQP7	0	0	0.0779558	0.0692113
AQP7P1	0.0223913	0.0371856	0.0389779	0.138423
AQP7P3	0	0	0.0194889	0
AQP8	0	0	0	0
AQP9	0.0447825	0	0.0974447	0.0692113
AQR	81.0116	83.1841	48.508	47.0983
AR	45.2079	46.5935	68.2113	70.5263
ARAF	46.3947	44.8458	50.8856	51.1817
ARAP1	56.314	56.8567	46.5201	46.9252
ARAP2	0	0	0	0
ARAP3	7.07564	7.58586	1.81247	2.07634
ARC	0.246304	0.223113	0.136423	0.138423
ARCN1	282.936	283.986	272.202	277.918
AREG	0.268695	0.297485	0.0584668	0
AREL1	69.2561	66.8225	64.3135	66.0276
ARF1	425.68	410.826	402.154	394.124
ARF3	116.994	118.919	96.0805	101.464
ARF4	287.392	297.373	318.449	315.569
ARF4-AS1	0.246304	0.223113	0.116934	0.103817
ARF5	140.326	137.996	120.403	123.577
ARF6	149.529	151.792	95.4959	100.91
ARFGAP1	104.007	97.4262	127.497	127.868
ARFGAP2	65.1362	67.1943	107.501	107.381
ARFGAP3	116.905	116.056	126.873	125.272
ARFGEF1	87.2363	86.7911	84.0558	84.507
ARFGEF2	84.3031	81.9942	82.1459	82.8113
ARFGEF3	0.0223913	0.0371856	0.0194889	0
ARFIP1	37.0575	38.8217	35.0801	36.1629
ARFIP2	48.2532	47.6719	55.524	54.5731
ARFRP1	35.0647	34.5082	48.6249	47.9634
ARG1	0	0	0	0
ARG2	0.738911	0.743712	1.03291	0.899747
ARGFX	0	0	0	0
ARGFXP2	0	0	0	0
ARGLU1	87.7513	82.961	99.608	94.681
ARHGAP1	102.283	105.124	74.2139	74.3675
ARHGAP10	31.0791	30.864	31.7475	29.6224
ARHGAP11A	207.925	207.83	14.0515	14.915
ARHGAP11B	6.47107	7.06526	0.545691	0.726718
ARHGAP12	49.6638	49.4568	105.513	103.713
ARHGAP15	0	0	0	0
ARHGAP17	65.0018	60.7612	34.7878	34.3634
ARHGAP18	36.0499	37.8921	37.6527	39.6927
ARHGAP19	31.7284	30.0407	12.632	11.4385
ARHGAP19-SLIT1	0	0.451433	0.133304	0.258158
ARHGAP20	4.83651	5.31754	1.94889	2.00713
ARHGAP21	106.269	109.623	87.4274	86.3065
ARHGAP22	61.6655	60.9843	44.5712	43.3955
ARHGAP23	80.2055	79.8002	158.445	156.694
ARHGAP24	28.2578	27.257	48.508	48.7939
ARHGAP25	0.0223913	0	0.0194889	0.103817
ARHGAP26	9.31476	8.58987	9.23776	10.4509
ARHGAP26-AS1	0	0	0	0
ARHGAP26-IT1	0	0	0	0
ARHGAP27	3.69456	4.1276	12.9991	11.7313
ARHGAP28	25.9739	27.9264	17.9688	18.0641
ARHGAP29	33.2062	35.3635	19.9372	21.5247
ARHGAP30	0.0447825	0.111557	0	0
ARHGAP31	44.4242	43.6559	21.9056	21.94
ARHGAP31-AS1	0.223913	0.148742	0.0389779	0.103817
ARHGAP32	48.5442	48.4528	50.8077	53.7772
ARHGAP33	31.9523	29.3766	10.9528	10.1741
ARHGAP35	205.619	211.4	160.959	164.965
ARHGAP36	0	0	0	0
ARHGAP39	11.5763	11.0813	31.9229	32.0448
ARHGAP4	20.0178	17.4028	31.2993	29.0341
ARHGAP40	0	0	0	0
ARHGAP42	10.3224	10.3748	21.0286	18.2718
ARHGAP44	2.28391	2.11958	0.292334	0.103817
ARHGAP5	95.3867	94.972	96.6847	94.335
ARHGAP5-AS1	0.806085	1.15275	1.28627	0.726718
ARHGAP6	5.03803	4.9085	32.9168	30.9028
ARHGAP8	0	0.148742	0.691663	0.310759
ARHGAP9	0.089565	0.185928	33.5989	32.3217
ARHGDIA	398.094	376.355	235.972	233.969
ARHGDIB	0.649346	0.520598	0.253356	0.207634
ARHGDIG	0.0223913	0	0	0
ARHGEF1	73.4433	71.731	61.8969	61.425
ARHGEF10	97.9393	93.9679	113.328	110.807
ARHGEF10L	31.8851	30.0831	37.5357	36.5436
ARHGEF11	41.2895	39.1192	43.8306	44.4336
ARHGEF12	393.325	398.22	331.117	333.218
ARHGEF15	0	0	0	0
ARHGEF16	0.0223913	0.0371856	0	0
ARHGEF17	111.979	109.697	292.782	278.506
ARHGEF18	68.1142	66.0044	88.8111	86.8601
ARHGEF19	3.08999	2.45425	1.53963	1.76489
ARHGEF2	134.907	132.715	448.382	449.666
ARHGEF25	19.6147	19.2621	25.0628	25.2275
ARHGEF26	1.56739	0.892454	0.253356	0.276845
ARHGEF26-AS1	0	0	0	0
ARHGEF28	16.3904	19.1134	6.7042	6.22901
ARHGEF3	9.42672	8.85017	18.7484	17.6835
ARHGEF3-AS1	0	0	0	0
ARHGEF33	0.111956	0.0743712	0.331312	0.449873
ARHGEF34P	0.0447825	0.0371856	0.0584668	0.103817
ARHGEF35	0.425434	0.371856	0.136423	0.103817
ARHGEF37	3.42586	2.90047	20.6583	22.113
ARHGEF38	0	0	0	0
ARHGEF38-IT1	0	0	0	0
ARHGEF39	13.9274	14.0561	0.604157	0.449873
ARHGEF4	0.694129	0.520598	1.03291	1.07277
ARHGEF40	142.991	137.624	136.501	134.962
ARHGEF5	1.00761	0.929639	0.487224	0.55369
ARHGEF6	44.4466	41.7222	160.141	165
ARHGEF7	41.5806	40.1976	80.6063	82.2922
ARHGEF7-AS1	0	0	0	0
ARHGEF7-AS2	0	0	0	0
ARHGEF9	20.4656	20.6752	40.7124	43.6377
ARHGEF9-IT1	0	0	0	0
ARID1A	97.8722	98.9508	65.8337	65.8545
ARID1B	53.5375	52.2829	50.5933	53.2927
ARID2	43.2375	42.2056	39.1923	38.7237
ARID3A	4.72455	4.75975	2.39714	2.35318
ARID3B	2.73173	3.04922	2.51407	2.42239
ARID3C	0.134348	0.0743712	0.0389779	0
ARID4A	30.9447	30.4178	29.1555	28.8265
ARID4B	50.246	54.2538	54.6665	55.9227
ARID5A	12.0241	11.5275	16.3512	17.372
ARID5B	71.5401	70.3179	53.5361	55.023
ARIH1	83.1163	84.0394	76.1043	79.0047
ARIH2	82.7357	82.6635	100.855	94.508
ARIH2OS	0.470216	0.483412	0.545691	0.692113
ARL1	93.3044	95.5297	101.771	103.056
ARL10	19.055	16.9194	14.5777	13.0809
ARL11	0	0.0371856	0	0
ARL13A	0	0	0	0
ARL13B	17.4204	17.7747	15.3573	15.4341
ARL14	0	0	0	0
ARL14EP	30.8328	31.4218	38.0619	38.3777
ARL14EPL	0.246304	0.223113	0.175401	0.103817
ARL15	11.7778	10.4491	8.16587	7.92469
ARL16	24.8095	24.1334	22.5487	19.5522
ARL17A	3.15829	3.23961	2.4484	2.45527
ARL17B	0.267575	0.14428	0.182611	0.24397
ARL2	59.001	58.8648	48.0987	48.4133
ARL2-SNX15	0	0	0	0
ARL2BP	77.5857	76.6395	67.7046	69.1075
ARL3	58.5755	56.9683	50.0671	50.5588
ARL4A	47.4471	47.7463	23.835	25.0545
ARL4C	57.456	54.7	126.094	124.096
ARL4D	25.7723	25.2118	44.3179	44.7105
ARL5A	28.9519	30.6409	26.1347	26.0234
ARL5B	17.3308	17.3285	17.2672	17.7527
ARL5C	0	0	0	0
ARL6	4.41108	5.02005	6.31442	6.64428
ARL6IP1	593.637	592.329	119.428	116.379
ARL6IP4	106.336	103.339	79.7488	77.6897
ARL6IP5	130.496	135.281	324.101	320.102
ARL6IP6	39.6325	42.3544	21.5548	21.5247
ARL8A	20.9358	20.8239	32.3906	31.3527
ARL8B	107.075	108.136	91.3447	89.0403
ARL9	0.0447825	0.111557	0.0779558	0.0346056
ARMC1	62.8075	62.0255	36.152	38.343
ARMC10	33.7884	33.3926	28.0251	28.4804
ARMC12	0.0671738	0.0371856	0.292334	0.311451
ARMC2	3.80651	3.71856	3.27414	3.84123
ARMC2-AS1	0	0	0	0
ARMC3	0.0223913	0	0.0194889	0.0346056
ARMC4	1.74652	1.93365	0.915981	0.968958
ARMC5	14.2856	12.3828	20.4829	17.4758
ARMC6	34.8856	29.0419	28.6877	27.9267
ARMC7	6.82933	6.9537	8.49718	8.6168
ARMC8	45.8797	44.2136	63.3976	64.5395
ARMC9	39.6325	42.0569	35.7427	35.3324
ARMCX1	68.4053	67.9009	81.7951	81.6347
ARMCX2	203.313	199.501	202.997	199.259
ARMCX3	103.112	104.491	170.918	174.239
ARMCX4	14.8454	14.2421	20.5414	20.2097
ARMCX5	11.1663	12.1407	11.3911	12.2064
ARMCX5-GPRASP2	7.60205	5.42723	8.68564	6.81143
ARMCX6	16.0321	17.8863	21.8276	21.6285
ARMS2	0.111956	0.0371856	0.0779558	0
ARMT1	33.7212	33.5786	27.2261	28.2036
ARNT	62.6507	61.5421	67.7046	69.7304
ARNT2	54.881	54.105	187.796	192.58
ARNTL	20.7343	22.237	17.2087	18.0641
ARNTL2	81.6609	84.3369	12.9991	12.0428
ARNTL2-AS1	0	0	0	0
ARPC1A	228.771	223.002	109.547	108.592
ARPC1B	194.334	179.978	60.2014	57.3761
ARPC2	303.648	306.484	204.907	201.82
ARPC3	211.082	210.21	125.255	122.885
ARPC4	116.483	117.201	102.507	102.214
ARPC4-TTLL3	12.3002	11.9544	13.4386	16.6744
ARPC5	259.47	265.208	110.522	113.991
ARPC5L	32.9599	32.6861	29.5063	28.7227
ARPIN	73.1104	72.5974	29.9812	32.0562
ARPP19	199.73	204.558	179.571	179.742
ARPP21	0.89565	1.0412	407.767	415.891
ARR3	0	0	0	0
ARRB1	14.3304	14.6139	22.4123	22.8397
ARRB2	8.48628	8.58987	6.08055	5.5369
ARRDC1	9.15802	7.92053	12.6288	11.4545
ARRDC1-AS1	14.8902	13.2753	13.0186	12.7349
ARRDC2	12.6063	13.0521	8.69207	8.23614
ARRDC3	52.7986	54.2909	28.8826	26.5425
ARRDC3-AS1	0.71652	0.818083	1.18883	0.968958
ARRDC4	4.79173	4.16478	15.1819	16.0916
ARRDC5	0	0	0	0.0692113
ARSA	42.6777	40.8298	47.4556	45.5064
ARSB	44.066	43.0237	42.6223	44.5721
ARSD	29.3773	33.5786	32.7414	34.225
ARSE	11.0165	10.1888	7.36682	6.92113
ARSF	0	0	0	0
ARSG	0.850868	1.18994	1.52014	1.07277
ARSH	0	0	0.136423	0.173028
ARSI	17.0397	15.1717	2.37765	2.49161
ARSJ	35.1767	38.7846	29.6232	30.8682
ARSK	14.935	14.2421	11.1087	12.5965
ART1	0	0	0	0
ART3	0	0	0	0
ART4	0	0	0	0
ART5	0.17913	0.260299	0.136423	0.103817
ARTN	1.90326	1.74772	9.54959	7.9939
ARV1	13.4795	13.0893	17.7739	17.8911
ARVCF	3.53782	3.38389	13.8956	11.9736
ARX	0.0223913	0	0.175401	0.103817
AS3MT	33.5022	36.3244	45.2005	44.8454
ASAH1	82.6461	84.3369	200.015	198.463
ASAH2	0.17913	0.260299	0.311823	0.173028
ASAH2B	0.134348	0.0743712	0.116934	0.138423
ASAP1	57.2544	60.6125	85.1082	84.7492
ASAP1-IT1	0	0.111557	0.0389779	0.0692113
ASAP1-IT2	0.089565	0.0743712	0.136423	0.138423
ASAP2	164.307	160.716	167.644	166.626
ASAP3	51.4327	52.6548	85.4396	86.9986
ASB1	74.2494	75.0777	213.521	214.382
ASB10	0	0	0	0
ASB11	0	0	0	0
ASB12	0	0	0	0
ASB13	6.17999	5.80095	7.17193	7.05955
ASB14	0	0	0.0584668	0
ASB15	0	0	0	0
ASB16	0.089565	0.0371856	3.05977	2.59542
ASB16-AS1	6.67259	7.32556	4.2291	4.49873
ASB17	0	0	0	0
ASB18	0	0	0.0194889	0
ASB2	0	0	0.74058	0.415268
ASB3	17.801	19.2621	12.7962	13.7575
ASB4	0	0	0.0389779	0.0346056
ASB5	806.152	821.058	960.162	982.592
ASB6	35.9827	33.9876	25.5305	25.7812
ASB7	15.7634	16.027	17.696	17.8565
ASB8	26.6904	26.9595	39.0169	40.5578
ASB9	0.134348	0.0743712	0.0389779	0
ASB9P1	0	0	0	0
ASCC1	22.4584	24.3194	26.466	26.1273
ASCC2	53.7838	53.7332	43.8112	46.1985
ASCC3	144.961	148.891	91.637	91.082
ASCL1	0	0	0	0
ASCL2	0	0	0	0
ASCL3	0	0	0	0
ASCL4	0	0	0	0
ASCL5	0	0	0.0194889	0.0346056
ASF1A	31.9523	31.3846	16.6046	17.6835
ASF1B	71.1594	69.2767	3.44954	3.6682
ASGR1	0.291086	0.33467	0.0974447	0.0346056
ASGR2	0	0	0	0
ASH1L	136.094	139.223	162.284	164.342
ASH1L-AS1	1.20913	0.966825	1.34474	0.79593
ASH2L	63.7927	64.0336	36.1715	35.7822
ASIC1	4.67977	4.6482	110.035	111.153
ASIC2	0	0	0.0974447	0.0692113
ASIC3	5.84412	5.87532	12.395	12.3542
ASIC4	0.0447825	0.111557	0.506713	0.242239
ASIC5	0	0	0.0194889	0
ASIP	0	0	0.0389779	0
ASL	44.6929	41.7966	19.9372	20.1059
ASMT	0.0223913	0	0	0
ASMTL	16.2784	14.9858	30.1104	28.7573
ASMTL-AS1	2.91086	3.16077	4.11217	4.42952
ASNA1	68.3157	72.2888	54.8809	54.4347
ASNS	32.5345	32.3886	61.8774	60.8021
ASNSD1	59.4488	57.6005	61.8189	62.74
ASPA	0.0223913	0.0743712	0.0194889	0
ASPDH	0	0	0	0
ASPG	0	0	0	0
ASPH	250.334	252.081	262.497	267.19
ASPHD1	0.582173	0.855268	0.721091	0.692113
ASPHD2	2.14956	2.30551	4.69684	4.84479
ASPM	410.208	411.198	13.7592	12.5272
ASPN	0.0447825	0.0371856	0.136423	0.103817
ASPRV1	0.201521	0.260299	0.954959	0.726718
ASPSCR1	29.3997	27.1827	19.1381	19.7598
ASRGL1	0.649346	0.520598	0.116934	0.173028
ASS1	4.81412	4.75975	57.8042	58.6912
ASTE1	11.1061	10.2632	10.1148	9.86261
ASTL	0	0	0	0
ASTN1	0	0	0	0
ASTN2	5.41868	6.87933	94.4629	93.9889
ASTN2-AS1	0	0	0	0
ASUN	32.0195	33.9132	30.7731	30.626
ASXL1	125.548	129.294	107.521	104.474
ASXL2	43.9988	43.1725	41.7064	41.4576
ASXL3	0	0	0	0
ASZ1	0	0	0	0
ATAD1	44.581	45.2548	76.1238	76.2016
ATAD2	199.73	200.988	20.5219	22.3898
ATAD2B	19.7491	19.8571	39.0948	38.2046
ATAD3A	39.2743	37.7434	28.3954	25.9542
ATAD3B	22.6599	22.5345	20.5414	18.2026
ATAD3C	0.0223913	0	0	0
ATAD5	26.3097	26.6992	3.41057	3.49517
ATAT1	19.8387	19.4852	19.2356	20.1751
ATCAY	0.0223913	0	0	0
ATE1	26.8919	29.7485	40.1667	41.2499
ATE1-AS1	1.09717	1.52461	0.623646	0.726718
ATF1	30.6536	31.9052	28.0836	26.9924
ATF2	61.3968	65.7069	60.3183	62.0825
ATF3	6.47107	6.28436	6.76267	6.36744
ATF4	190.415	192.398	336.652	324.809
ATF5	23.6004	22.1998	27.6158	26.854
ATF6	87.5946	92.2946	96.7821	95.7192
ATF6B	91.1996	88.0926	84.0364	84.853
ATF7	60.5907	61.7652	68.3477	66.512
ATF7IP	94.9389	95.8272	92.0073	94.7848
ATF7IP2	2.50782	2.8261	1.75401	1.73028
ATG10	10.3	10.226	6.08055	6.81731
ATG101	30.3849	29.7856	55.641	60.0408
ATG12	55.9334	54.9603	63.6704	66.5812
ATG13	59.8742	63.1039	65.7167	67.3426
ATG14	25.5036	24.1334	28.7267	27.996
ATG16L1	34.5049	33.7645	29.5842	29.2418
ATG16L2	20.3984	23.0551	19.8982	20.1405
ATG2A	29.9595	30.0088	32.0398	31.5257
ATG2B	50.7834	51.7995	69.8484	70.9762
ATG3	46.8201	45.1805	33.3456	33.429
ATG4A	10.0985	10.6723	14.6557	14.7074
ATG4B	39.0951	40.1976	63.8458	63.0861
ATG4C	21.3836	21.3817	14.2854	13.8076
ATG4D	16.883	15.8039	19.8592	21.0056
ATG5	71.0698	75.338	38.1594	40.2117
ATG7	25.123	24.5797	19.8787	20.798
ATG9A	86.1168	87.0886	102.57	103.921
ATG9B	0.380651	0.297485	0.194889	0.138423
ATHL1	7.00846	6.84215	21.2819	19.3792
ATIC	92.4759	91.8856	77.8194	78.5894
ATL1	15.8306	16.8823	8.59463	9.58576
ATL2	43.3271	44.5483	45.6236	47.7212
ATL3	195.677	195.894	51.178	51.4932
ATM	96.6406	99.8433	118.454	118.905
ATMIN	67.6888	68.124	71.6219	68.796
ATN1	141.289	136.917	137.163	138.665
ATOH1	0	0	0	0
ATOH7	0.111956	0.111557	0.0779558	0.103817
ATOH8	338.332	331.695	7.36682	6.92113
ATOX1	39.0056	41.8338	24.4391	24.0163
ATP10A	122.48	121.299	18.8263	17.372
ATP10B	0	0	0	0
ATP10D	72.5029	70.2064	81.152	79.8352
ATP11A	32.2882	34.0992	69.634	65.5431
ATP11A-AS1	0	0	0	0
ATP11AUN	0	0	0	0
ATP11B	100.559	101.851	66.1065	68.0693
ATP11C	35.8932	34.4338	28.3759	27.0616
ATP12A	0	0	0	0
ATP13A1	44.9169	42.1684	55.9333	54.1924
ATP13A2	27.8995	27.257	80.236	80.7349
ATP13A3	155.619	151.866	186.042	188.981
ATP13A4	0.089565	0.111557	0.214378	0.242239
ATP13A4-AS1	0	0	0	0
ATP13A5	0	0	0	0
ATP13A5-AS1	0	0	0	0
ATP1A1	285.377	289.49	1176.8	1209.09
ATP1A1-AS1	2.77652	2.26832	1.16934	0.934352
ATP1A2	3.47064	3.30952	49.6578	51.5624
ATP1A3	0.873259	0.780897	0.0584668	0.138423
ATP1A4	0.0223913	0	0.175401	0.173028
ATP1B1	109.605	109.214	88.168	86.7563
ATP1B2	0.0447825	0	0	0
ATP1B3	129.847	128.588	206.602	199.605
ATP1B4	0	0	0.0194889	0
ATP2A1	7.74737	6.4331	22.3928	23.2204
ATP2A1-AS1	3.24673	3.01203	2.1243	2.04173
ATP2A2	297.759	293.32	839.428	843.201
ATP2A3	1.76891	1.59898	0.623646	0.346056
ATP2B1	1052.52	1083.66	700.16	702.944
ATP2B2	0.134348	0.446227	0.993936	1.2112
ATP2B2-IT2	0	0	0	0
ATP2B3	0	0	0.253356	0.138423
ATP2B4	415.089	423.99	79.8657	80.908
ATP2C1	157.366	157.778	129.407	128.145
ATP2C2	0	0	0	0
ATP4A	0	0	0	0
ATP4B	0	0	0	0
ATP5A1	349.192	349.656	413.867	427.726
ATP5B	589.45	582.438	561.827	569.263
ATP5C1	127.227	122.75	207.284	207.219
ATP5D	41.9612	38.1524	43.3239	40.0733
ATP5E	163.493	165.709	176.737	164.959
ATP5EP2	0.089565	0.0743712	0	0
ATP5F1	124.159	124.349	122.722	124.096
ATP5G1	38.3786	39.5655	41.8818	46.3716
ATP5G2	150.111	146.288	140.944	143.025
ATP5G3	128.593	126.505	127.653	130.083
ATP5H	81.8624	95.0835	69.8094	71.3914
ATP5I	59.4264	57.7864	60.1039	61.6672
ATP5J	85.2435	83.9278	79.8852	78.5548
ATP5J2	159.739	161.199	147.835	147.512
ATP5J2-PTCD1	1.23286	0	1.75147	5.57497
ATP5L	95.7898	99.5458	88.5188	90.7014
ATP5L2	0.0447825	0	0.0389779	0.0346056
ATP5O	111.732	107.206	88.9476	84.4378
ATP5S	4.56782	4.20197	6.62624	5.70993
ATP5SL	31.9523	32.5746	20.7362	19.2407
ATP6AP1	91.9385	91.1418	145.914	146.174
ATP6AP1L	2.93325	2.8261	3.81983	3.84123
ATP6AP2	146.081	144.54	139.19	141.295
ATP6V0A1	31.0119	32.1655	96.2949	94.4388
ATP6V0A2	33.4525	33.2067	41.8818	40.8347
ATP6V0A4	0.201521	0.185928	0	0
ATP6V0B	69.5248	68.533	104.851	101.152
ATP6V0C	60.031	57.0427	67.3538	63.8474
ATP6V0CP3	0	0	0	0
ATP6V0D1	78.0559	75.9701	101.927	98.9029
ATP6V0D2	0	0.0743712	0	0
ATP6V0E1	154.903	157.481	120.598	121.327
ATP6V0E2	6.6502	7.54867	19.0407	19.829
ATP6V0E2-AS1	2.19434	2.26832	7.36682	7.71706
ATP6V1A	87.1691	85.5268	100.66	99.5604
ATP6V1B1	1.20913	1.56179	3.3521	3.7028
ATP6V1B1-AS1	0.0447825	0	0	0
ATP6V1B2	97.4915	102.483	140.262	144.236
ATP6V1C1	54.9929	56.0758	68.3867	69.765
ATP6V1C2	0	0	0.0779558	0.0346056
ATP6V1D	85.96	87.2745	75.4612	72.1874
ATP6V1E1	88.6246	88.6132	100.582	98.1762
ATP6V1E2	1.00761	0.818083	0.721091	0.830535
ATP6V1F	65.4049	69.0164	67.7631	68.4153
ATP6V1G1	51.5223	53.2869	54.2962	58.3105
ATP6V1G2	1.26779	1.28997	1.69437	1.59013
ATP6V1G2-DDX39B	2.38333	2.3003	5.34855	8.39498
ATP6V1G3	0.201521	0.409041	0.175401	0.207634
ATP6V1H	47.044	48.5272	40.4396	39.2082
ATP7A	28.4817	27.5917	29.1165	27.1308
ATP7B	6.82933	8.40394	8.2828	8.85904
ATP8A1	0.470216	0.483412	0.760069	0.726718
ATP8A2	8.03846	8.92454	7.50325	7.44021
ATP8B1	55.5527	56.6336	26.0177	25.1929
ATP8B2	84.7957	87.6092	69.0104	68.6576
ATP8B3	8.53107	8.88735	2.33867	1.73028
ATP8B4	0.850868	0.557784	2.4751	2.31858
ATP8B5P	0	0	0	0.0346056
ATP9A	60.2325	59.1251	70.2577	70.7685
ATP9B	13.8378	14.3536	17.696	18.2718
ATPAF1	24.4289	24.8771	27.0312	26.7502
ATPAF2	10.3	9.66825	11.4595	11.3506
ATPIF1	79.5785	76.751	52.0745	49.313
ATR	52.194	52.8407	41.8623	40.8693
ATRAID	96.7302	93.6705	93.5664	91.6357
ATRIP	16.0545	16.6379	8.89476	8.38702
ATRN	97.0437	97.2775	105.065	105.686
ATRNL1	25.1454	25.4721	7.50325	7.26718
ATRX	145.633	151.42	163.844	162.093
ATXN1	81.437	80.8786	115.258	117.798
ATXN10	242.878	244.346	187.718	187.009
ATXN1L	56.2468	59.1251	57.4729	61.252
ATXN2	41.1999	40.272	32.8389	33.6713
ATXN2L	139.453	140.933	144.101	146.036
ATXN3	23.6676	24.1706	18.7094	19.829
ATXN3L	0	0	0	0
ATXN7	28.8399	29.7856	32.644	33.3944
ATXN7L1	6.31433	6.32155	9.58856	8.33996
ATXN7L2	3.42586	4.27634	4.24859	4.18728
ATXN7L3	63.5464	62.1743	68.5037	66.6505
ATXN7L3B	82.7133	80.953	111.75	109.7
ATXN8OS	0	0	0	0
AUH	6.47107	6.61903	5.69077	6.05599
AUNIP	7.52346	6.99089	1.09138	1.00356
AUP1	79.2426	81.3992	117.284	116.932
AURKA	112.404	114.383	7.19142	8.37456
AURKAIP1	66.5244	61.0215	55.7579	51.4932
AURKAPS1	0.156739	0.371856	0.0194889	0.311451
AURKB	62.1133	65.1491	2.31919	2.52621
AURKC	0.335869	0.446227	0.545691	0.519085
AUTS2	10.5015	10.1888	14.0126	14.9842
AVEN	53.4031	55.5552	45.4482	46.3369
AVIL	0.582173	0.966825	1.03291	0.79593
AVL9	91.6474	92.5549	90.4872	92.397
AVP	0	0	0	0
AVPI1	11.7554	12.2341	12.3365	12.8387
AVPR1A	0	0	0	0
AVPR1B	0	0	0	0
AVPR2	0.582173	0.33467	0.915981	1.10738
AWAT1	0	0	0	0
AWAT2	0.0223913	0	0.0584668	0.138423
AXDND1	0.0671738	0.111557	0.0584668	0
AXIN1	24.0706	22.7576	21.9446	20.0367
AXIN2	2.23913	2.15676	17.7155	17.9257
AXL	672.924	667.109	83.2178	83.8149
AZGP1	0	0	0	0
AZGP1P1	0	0	0	0
AZI2	58.2173	62.3974	49.6578	52.7044
AZIN1	219.994	220.622	202.763	208.118
AZIN1-AS1	1.16435	0.594969	0.915981	0.865141
AZIN2	15.8978	17.44	16.4487	15.9532
AZU1	0.0447825	0	0	0
B2M	962.197	937.486	2178.96	2152.57
B3GALNT1	1.09717	1.26431	0.56518	0.415268
B3GALNT2	40.0132	40.4951	51.6652	53.3619
B3GALT1	0	0	0.0194889	0
B3GALT2	2.95565	2.45425	43.0706	42.3919
B3GALT4	0.0223913	0.111557	0.0584668	0
B3GALT5	0.940433	0.966825	1.96838	1.62646
B3GALT5-AS1	0.17913	0.185928	0.623646	0.449873
B3GALT6	41.2895	41.276	41.2386	37.3741
B3GAT1	0	0	0	0
B3GAT2	0	0.0371856	0	0
B3GAT3	37.9532	32.4258	35.8402	33.6367
B3GLCT	33.6988	35.4007	11.9077	12.7349
B3GNT2	13.5691	12.9406	12.9991	13.3232
B3GNT3	0	0	0	0
B3GNT4	0	0	0	0
B3GNT5	26.7799	25.7696	5.74924	5.29466
B3GNT6	0	0	0	0
B3GNT7	0.17913	0.148742	0.37029	0.346056
B3GNT8	0.0447825	0	0.0194889	0.0346056
B3GNT9	86.0272	86.6424	49.5019	50.0744
B3GNTL1	4.29912	4.01604	3.76137	2.83766
B4GALNT1	3.96325	3.3467	2.08532	2.04173
B4GALNT2	0	0	0	0
B4GALNT3	20.2193	21.0099	7.7566	6.67889
B4GALNT4	0	0	0.0389779	0.0692113
B4GALT1	257.701	269.781	225.117	228.882
B4GALT1-AS1	0.918041	1.37587	0.545691	0.519085
B4GALT2	102.955	98.1699	62.7349	64.055
B4GALT3	30.3625	28.2982	31.5916	30.8682
B4GALT4	40.1699	41.9453	26.1737	27.9614
B4GALT4-AS1	0	0	0	0
B4GALT5	82.6237	86.9771	82.3018	85.5797
B4GALT6	0	0	0	0
B4GALT7	22.9734	22.0139	25.8034	24.6738
B4GAT1	33.9899	32.9092	43.4604	42.6687
B9D1	5.84412	6.06125	4.09268	4.2911
B9D2	3.53782	3.16077	1.73452	2.49161
BAALC	0.335869	0.185928	2.10481	1.62646
BAALC-AS1	0.111956	0.148742	0.214378	0.173028
BAALC-AS2	0	0.0371856	0	0
BAAT	0.111956	0.0743712	0.253356	0.276845
BABAM1	80.1831	80.1349	57.4144	57.0993
BACE1	209.56	210.693	94.2875	96.3421
BACE1-AS	1.14195	1.15275	2.10481	1.90331
BACE2	15.5619	15.1717	63.0662	65.9929
BACH1	73.6672	73.1812	96.1975	93.6775
BACH1-IT2	0.0223913	0.0371856	0.116934	0.103817
BACH2	2.44065	3.01203	4.77479	4.11807
BAD	41.491	39.1192	33.6964	33.7751
BAG1	33.0495	30.455	45.916	44.053
BAG2	34.9304	33.9876	56.0892	55.0922
BAG3	51.1416	49.5684	56.1087	54.5385
BAG4	19.5028	19.5224	14.071	14.3959
BAG5	61.7775	61.2446	74.8571	76.1324
BAG6	153.335	151.792	157.237	156.314
BAGE	0	0	0	0
BAGE2	0	0	0	0
BAGE3	0	0	0	0
BAGE4	0	0	0	0
BAGE5	0	0	0	0
BAHCC1	23.1973	21.9023	40.4006	37.2011
BAHD1	23.1526	26.1043	26.6804	25.4697
BAIAP2	34.0795	33.7645	38.5102	35.6784
BAIAP2-AS1	24.8543	24.6912	27.7523	28.5843
BAIAP2L1	4.38869	5.16879	33.6184	32.114
BAIAP2L2	0.156739	0.0743712	0.233867	0.207634
BAIAP3	0.313478	0.148742	3.66392	3.21832
BAK1	20.1969	21.4933	21.7692	22.4591
BAMBI	19.4356	21.1958	2.6505	2.76845
BANCR	0	0.0743712	0	0
BANF1	137.729	147.404	106.721	108.454
BANF2	0	0	0	0
BANK1	0.380651	0.33467	0.74058	1.00356
BANP	12.0017	12.7175	9.80294	9.93182
BAP1	95.8793	95.7157	78.8523	79.593
BARD1	31.2806	32.0912	8.4582	7.78627
BARHL1	0	0	0	0
BARHL2	0	0	0	0
BARX1	0	0	0	0
BARX2	0	0	0	0
BASP1	119.726	117.06	37.068	36.8204
BASP1P1	0	0	0	0
BATF	0	0	0	0
BATF2	0.156739	0.111557	0.311823	0.346056
BATF3	2.28391	2.19395	0.818536	0.79593
BAX	74.3837	77.6063	29.7012	31.1451
BAZ1A	76.3094	78.2756	49.0147	48.0672
BAZ1B	322.188	326.712	214.3	212.825
BAZ2A	97.5363	103.004	140.106	141.572
BAZ2B	44.5138	48.899	70.1407	69.765
BBC3	8.1952	7.51149	8.04894	6.7481
BBIP1	16.7263	16.4732	16.6825	16.7837
BBOX1	0	0	0.37029	0.103817
BBOX1-AS1	2.86608	1.93365	0.350801	0.484479
BBS1	17.1069	17.2169	20.5803	21.8708
BBS10	46.1708	45.9614	32.4101	33.1522
BBS12	9.44911	9.25921	13.4864	14.8804
BBS2	40.7521	39.9373	30.5977	28.515
BBS4	21.4956	22.1998	27.6743	26.3695
BBS5	11.9793	12.0481	12.4729	12.7349
BBS7	28.0786	27.9636	17.5985	18.8947
BBS9	24.8767	27.0711	20.9896	23.7741
BBX	97.3348	101.74	125.918	126.83
BCAM	4.50064	5.24317	514.995	493.788
BCAN	0.0223913	0.0743712	0.116934	0.0346056
BCAP29	91.4907	90.8072	79.7488	79.2123
BCAP31	132.623	141.156	147.453	151.192
BCAR1	70.1518	72.6606	153.066	147.801
BCAR3	112.068	109.512	112.51	109.319
BCAR4	0	0	0	0
BCAS1	0	0	1.16934	1.10738
BCAS2	35.3558	37.0368	31.2408	33.0484
BCAS3	12.8302	11.7878	21.7107	20.4519
BCAS4	5.68738	5.46628	2.66999	3.18372
BCAT1	140.169	136.508	183.488	187.39
BCAT2	13.0765	13.6471	15.9809	15.3995
BCCIP	58.6427	60.6497	58.2525	56.2342
BCDIN3D	5.84412	6.09843	12.2001	11.7659
BCDIN3D-AS1	1.18674	1.3015	2.08532	2.52621
BCHE	3.29151	4.46227	3.5275	4.42952
BCKDHA	18.3608	20.2661	24.751	24.397
BCKDHB	32.0867	31.9796	24.0299	23.8087
BCKDK	68.9427	67.4546	192.492	186.524
BCL10	20.1745	20.1546	12.1806	11.9043
BCL11A	0.0223913	0	0.0389779	0
BCL11B	0	0	0	0
BCL2	2.48543	2.34269	3.15721	2.97608
BCL2A1	0	0.0371856	0	0.0346056
BCL2L1	50.8281	51.4648	232.698	239.367
BCL2L10	0.0223913	0.0371856	0.136423	0.173028
BCL2L11	25.1006	24.3937	121.085	124.303
BCL2L12	25.8619	26.8852	8.20485	8.68601
BCL2L13	83.5194	86.0102	106.741	106.032
BCL2L14	0	0	0	0
BCL2L15	0.089565	0.148742	0.331312	0.276845
BCL2L2	41.0799	38.9515	73.3866	75.3946
BCL2L2-PABPN1	64.889	70.8188	88.215	91.6762
BCL3	15.0469	14.7627	23.7765	23.2204
BCL6	17.9578	19.3737	93.0597	95.0271
BCL6B	0.0223913	0.0371856	0	0
BCL7A	9.51628	10.412	23.757	24.1893
BCL7B	50.8058	50.7955	52.932	53.881
BCL7C	45.9692	47.2257	16.0004	15.3649
BCL9	16.1441	17.1426	13.1356	12.458
BCL9L	89.4307	89.9147	77.8778	75.4749
BCLAF1	258.216	258.923	236.693	241.686
BCO1	0	0	0.0194889	0.0346056
BCO2	0.313478	0.371856	0.467735	0.657507
BCOR	60.4116	58.6045	40.2252	40.4886
BCORL1	15.2708	17.7375	10.524	11.4891
BCORP1	0	0	0.0389779	0
BCR	7.20998	7.36274	40.6929	42.9456
BCRP2	0	0	0.0389779	0.0346056
BCRP3	0	0.0371856	0.56518	0.657507
BCS1L	18.8982	19.2993	19.8008	19.5868
BCYRN1	0	0	0	0
BDH1	0.17913	0.260299	0.116934	0.207634
BDH2	44.1779	44.6599	51.7432	52.2545
BDKRB1	60.9714	58.4557	0.311823	0.138423
BDKRB2	9.49389	10.4863	1.32525	1.48804
BDNF	8.39672	9.55669	8.06843	8.33996
BDNF-AS	1.65695	1.26431	2.51407	2.18016
BDP1	69.4129	71.2847	71.1347	72.8103
BEAN1	0.806085	0.520598	42.9342	43.7069
BEAN1-AS1	0	0	0.0389779	0
BECN1	59.7623	63.7361	70.7254	72.6372
BECN2	0	0	0	0
BEGAIN	0	0.0371856	0.0194889	0
BEND2	0	0	0	0
BEND3	5.14999	4.68538	5.1061	5.19085
BEND3P3	0	0.0371856	0	0
BEND4	0	0	0	0
BEND5	0.738911	0.929639	0.448246	0.138423
BEND6	23.3989	23.7616	11.3231	11.6967
BEND7	8.77737	9.11047	5.45691	5.74454
BEST1	1.2763	1.41305	0.643135	0.657507
BEST2	0.0447825	0.111557	0.0194889	0.0346056
BEST3	0.604564	0.409041	19.4695	18.9985
BEST4	0.156739	0.0743712	0.584668	0.968958
BET1	31.3925	32.2771	20.9896	21.0748
BET1L	45.1632	44.0277	61.7995	60.2138
BEX1	0.0671738	0.0743712	0.0194889	0
BEX2	0.17913	0.260299	2.00736	1.79949
BEX4	2.97804	2.52862	2.2997	2.31858
BEX5	0	0	0	0
BFAR	67.3529	68.3471	51.8796	52.2199
BFSP1	3.38108	3.3467	17.6765	18.2372
BFSP2	0	0	0	0
BGLAP	0.0676216	0.393052	10.5911	10.9776
BGLT3	0	0	0	0
BGN	1.07478	1.0412	1.77349	2.11094
BHLHA15	0	0.0371856	0.0194889	0
BHLHA9	0	0	0	0
BHLHB9	9.29237	9.63106	9.99783	9.62037
BHLHE22	0	0	0	0
BHLHE23	0	0	0	0
BHLHE40	122.615	128.03	76.2603	77.1014
BHLHE40-AS1	0.626955	0.743712	0.409268	0.519085
BHLHE41	9.56107	10.0029	7.11347	6.67889
BHMG1	0	0	0.0194889	0
BHMT	0.0223913	0.0743712	0	0.0346056
BHMT2	3.15717	3.12359	4.96968	5.05242
BICC1	24.2945	22.7576	29.6427	29.3802
BICD1	13.5915	13.7958	15.8445	15.8148
BICD2	103.985	101.033	209.448	212.167
BID	9.38194	9.11047	13.1745	11.8697
BIK	0	0.111557	0	0
BIN1	103.358	99.0996	1253	1228.43
BIN2	0	0	0	0
BIN3	23.1302	23.3897	27.8107	27.3731
BIN3-IT1	0.111956	0.185928	0.214378	0.276845
BIRC2	162.628	161.014	79.4564	77.6204
BIRC3	1.67934	2.00802	1.83196	2.11094
BIRC5	250.2	250.594	10.8943	9.7934
BIRC6	158.441	155.175	192.98	195.072
BIRC6-AS2	0	0	0	0
BIRC7	0	0	0	0
BIRC8	0	0	0	0
BISPR	0.0671738	0	0.136423	0.0692113
BIVM	36.8896	40.166	62.7359	62.3874
BIVM-ERCC5	32.9581	27.6133	33.5791	37.8077
BLACAT1	0.0223913	0.0371856	0.0194889	0.0346056
BLACE	0	0	0	0
BLCAP	130.989	131.525	385.16	377.409
BLID	0.223913	0.111557	0.0974447	0.138423
BLK	0	0	0	0
BLM	30.273	30.0459	2.37765	3.39135
BLMH	47.3351	47.8207	39.2313	41.8036
BLNK	0	0	0	0
BLOC1S1	50.8118	49.2501	34.9741	35.4919
BLOC1S1-RDH5	3.81569	3.60737	10.9183	9.84946
BLOC1S2	57.456	54.2166	42.5054	43.3609
BLOC1S3	7.90411	7.84616	9.68601	9.03207
BLOC1S4	11.2404	11.825	13.6423	12.458
BLOC1S5	17.8358	17.6044	13.0149	12.5459
BLOC1S5-TXNDC5	16.9444	14.5872	16.0671	13.9738
BLOC1S6	85.6018	85.3781	64.3135	65.5777
BLVRA	47.2903	49.3824	52.1914	54.6077
BLVRB	30.7432	27.5545	20.6193	20.5904
BLZF1	22.2345	20.638	17.657	16.5069
BMF	32.8256	31.7937	21.9446	22.3552
BMI1	36.1715	36.6572	31.0843	30.2149
BMP1	110.21	110.516	107.91	104.993
BMP10	0	0.0371856	0	0
BMP15	0	0	0	0
BMP2	0.223913	0.185928	2.84539	2.80306
BMP2K	33.878	32.6861	23.6986	23.2896
BMP3	0.0671738	0.0371856	0.175401	0.0692113
BMP4	8.73259	9.89136	23.6791	22.9089
BMP5	0	0	0	0
BMP6	0.0223913	0	0.0389779	0.103817
BMP7	0	0	0	0
BMP7-AS1	0	0	0	0
BMP8A	0.0671738	0.0371856	2.68948	3.28754
BMP8B	2.10478	1.85928	11.2646	11.4199
BMPER	20.8463	22.4973	3.7029	4.74097
BMPR1A	41.5806	40.2348	40.8488	38.3777
BMPR1B	8.17281	8.2552	8.49718	8.65141
BMPR1B-AS1	0	0	0	0
BMPR2	213.344	212.144	131.239	139.668
BMS1	76.69	79.354	69.1273	69.6958
BMS1P17	0	0	0	0
BMS1P18	0	0	0	0
BMS1P20	11.218	11.3044	14.6752	15.7456
BMS1P21	0.140393	0.0371856	0.175401	0.0346056
BMS1P4	5.1276	3.90449	7.28887	7.85548
BMS1P5	1.83608	1.71054	1.90992	2.00713
BMS1P6	2.44065	2.64018	2.04634	1.66107
BMX	0	0	0	0
BNC1	34.8632	34.7685	9.37418	8.6168
BNC2	54.8362	55.5552	76.6111	80.2851
BNIP1	10.2776	10.0029	8.59463	7.92469
BNIP2	71.3161	70.5039	64.2746	63.4321
BNIP3	99.238	102.037	40.7124	39.6235
BNIP3L	216.143	214.3	111.691	113.991
BNIPL	0.201521	0.185928	0.643135	0.484479
BOC	11.7106	10.3004	51.6262	50.7665
BOD1	65.9646	64.9632	66.8861	66.4774
BOD1L1	109.941	107.987	188.867	192.615
BOD1L2	0	0	0	0
BOK	62.7179	63.3642	77.3127	77.4128
BOK-AS1	0.246304	0.148742	0.253356	0.103817
BOLA1	8.17281	7.4743	6.95756	6.36744
BOLA2	6.56064	6.30296	4.77479	4.34301
BOLA2B	6.56064	6.30296	4.77479	4.34301
BOLA3	11.8002	10.8582	7.932	8.30535
BOLA3-AS1	2.91086	3.01203	3.05977	3.46056
BOLL	0	0	0	0
BOP1	27.3397	25.1746	88.5773	87.483
BORA	31.4373	32.463	4.11217	4.46413
BORCS5	6.15759	4.87131	9.51061	9.03207
BORCS6	8.30715	7.88334	13.1745	11.5237
BORCS7	38.4955	39.1036	81.6883	81.4229
BORCS7-ASMT	3.72949	3.77768	5.40195	6.78997
BORCS8	13.0469	11.8507	9.99783	9.47087
BPESC1	0	0	0	0
BPGM	45.5662	47.8207	53.5361	52.6352
BPHL	14.6439	15.8039	14.5193	14.569
BPI	0	0	0	0
BPIFA1	0	0	0	0
BPIFA2	0	0	0	0
BPIFA3	0	0	0	0
BPIFA4P	0	0	0	0
BPIFB1	0	0	0	0
BPIFB2	0	0	0	0
BPIFB3	0	0	0	0
BPIFB4	0	0	0	0
BPIFB6	0	0	0	0
BPIFC	0	0	0.0194889	0
BPNT1	21.4956	22.6088	25.6475	26.2311
BPTF	104.007	103.525	112.627	110.738
BPY2	0	0	0	0
BPY2B	0	0	0	0
BPY2C	0	0	0	0
BRAF	11.9345	13.424	12.0637	11.6967
BRAP	25.6604	26.3646	29.4088	29.2418
BRAT1	68.4501	60.8356	56.9857	54.8153
BRCA1	99.4172	99.4342	14.4998	13.3232
BRCA2	63.5464	65.1491	7.26938	7.54403
BRCAT107	0	0	0	0
BRCAT54	0.134348	0.111557	0.0389779	0.138423
BRCC3	24.9662	26.2158	20.9311	21.8708
BRD1	51.1416	49.1593	51.1975	48.6209
BRD2	209.358	216.755	241.137	245.7
BRD3	50.7834	47.5975	88.168	86.8601
BRD4	55.8886	52.9523	67.6267	64.5741
BRD7	65.987	67.1943	61.5656	61.7018
BRD7P3	0	0	0	0
BRD8	107.209	107.429	57.8237	60.4907
BRD9	43.3942	43.1725	45.5847	45.5064
BRDT	0	0	0	0
BRDTP1	0	0	0	0
BRE	36.6097	36.7393	31.4162	33.083
BRE-AS1	0.761303	1.11557	0.568298	0.692113
BREA2	0.0671738	0.111557	0.116934	0
BRF1	18.025	18.3697	57.7068	55.4036
BRF2	10.8374	10.9697	16.8385	15.8148
BRI3	64.4196	64.4798	94.0926	95.4077
BRI3BP	5.57542	4.87131	1.69554	1.66107
BRICD5	2.14956	1.89646	4.24859	3.97965
BRINP1	0.0447825	0	0.448246	0.55369
BRINP2	0.0671738	0.111557	0.389779	0.311451
BRINP3	0	0	0	0
BRIP1	65.7855	64.2567	4.46297	4.39492
BRIX1	29.3773	27.9636	22.6656	22.7705
BRK1	148.275	148.222	109.528	107.451
BRMS1	52.2388	51.6879	37.3993	35.886
BRMS1L	22.9958	23.7616	32.2347	32.2525
BROX	61.5312	58.2698	37.2434	38.6199
BRPF1	31.9523	31.7937	25.7839	25.1929
BRPF3	36.6545	38.1524	49.2291	50.0051
BRS3	0	0	0	0
BRSK1	7.70259	8.06927	12.2975	13.1501
BRSK2	0.089565	0	0.116934	0.138423
BRWD1	63.8151	62.0255	98.2828	102.571
BRWD1-AS1	0	0	0	0
BRWD1-IT2	0.223913	0.148742	0.194889	0.276845
BRWD3	30.8104	31.1615	25.6085	25.9542
BSCL2	15.4506	14.8088	18.7657	18.6735
BSDC1	75.8616	78.2013	97.2109	97.7609
BSG	369.904	355.717	278.146	267.363
BSN	1.00761	0.966825	2.31919	2.21476
BSN-AS2	0.089565	0.0371856	0	0
BSND	0	0	0	0
BSPH1	0	0	0	0
BSPRY	0.0223913	0	0	0
BST1	0.671738	0.892454	0.409268	0.380662
BST2	0.0223913	0.0743712	0.292334	0.103817
BSX	0	0	0	0
BTAF1	77.2722	75.0777	80.1581	78.6932
BTBD1	105.396	106.165	114.225	118.559
BTBD10	50.0221	49.3453	35.9766	36.1975
BTBD11	1.43304	1.52461	0.194889	0.207634
BTBD16	0.0223913	0.0371856	0.311823	0.207634
BTBD17	0	0	0	0
BTBD18	0	0	0	0
BTBD19	5.10521	4.42508	12.356	11.6621
BTBD2	94.2672	89.3569	54.4716	52.8774
BTBD3	21.0254	20.5636	14.7142	15.0188
BTBD6	35.6693	36.1444	110.853	108.939
BTBD7	74.0479	73.4787	59.4803	62.567
BTBD8	0.53739	0.780897	1.01343	0.899747
BTBD9	13.0541	13.0521	17.618	18.7909
BTC	0.246304	0.111557	0.0974447	0.103817
BTD	32.9823	31.6449	16.4877	16.6107
BTF3	318.672	319.089	291.262	291.241
BTF3L4	48.9025	48.5272	58.8956	59.937
BTF3P11	0	0	0	0
BTG1	55.2616	55.2578	228.215	231.2
BTG2	66.1662	64.8145	44.2594	44.6759
BTG3	46.529	43.0981	19.8398	20.9364
BTG4	0.089565	0.111557	0.0194889	0.0346056
BTK	0	0	0	0
BTLA	0.0447825	0.0371856	0.0389779	0.173028
BTN1A1	0.0223913	0	0.0389779	0
BTN2A1	46.0588	48.1181	56.6739	58.1721
BTN2A2	16.0321	17.1426	15.0065	15.2957
BTN2A3P	3.62738	3.56982	2.96232	2.76845
BTN3A1	17.6219	19.634	29.8376	31.6988
BTN3A2	35.4006	35.5122	54.1988	55.2652
BTN3A3	15.4052	16.9566	27.8497	27.4769
BTNL10	0	0	0	0
BTNL2	0	0	0	0
BTNL3	0	0	0.0194889	0
BTNL8	0	0	0.467735	0.103817
BTNL9	0	0	0	0
BTRC	28.1906	27.7776	32.1957	33.0138
BUB1	156.492	161.311	7.63967	7.26718
BUB1B	161.529	162.052	7.4058	6.84984
BUB3	175.391	175.813	90.8965	88.7635
BUD13	25.5932	28.1123	13.9541	13.9807
BUD31	59.3368	59.5341	50.5933	49.8321
BVES	46.4395	47.4488	105.24	109.665
BVES-AS1	0.783694	1.0412	1.5786	1.2112
BYSL	18.0921	17.7747	30.6756	29.1033
BZRAP1	9.7402	10.5235	6.80164	6.60968
BZRAP1-AS1	1.56739	1.00401	1.28627	1.14199
BZW1	287.145	280.23	144.374	149.323
BZW2	96.1033	93.1871	52.2499	55.5767
C10orf10	13.4348	14.0561	20.4049	19.7598
C10orf105	0	0.0371856	0.0194889	0
C10orf107	0.268695	0.33467	0.37029	0.415268
C10orf11	0	0	0.0389779	0.0692113
C10orf111	0.380651	0.148742	0.448246	0.519085
C10orf113	0	0	0	0
C10orf12	10.3448	9.33358	5.22304	5.95217
C10orf120	0	0	0	0
C10orf126	0.0223913	0	0	0
C10orf128	0.0223913	0	0.0974447	0.0692113
C10orf131	0.0671738	0.148742	0.0194889	0
C10orf142	0	0	0	0
C10orf2	9.31476	10.1517	13.194	12.8733
C10orf25	2.44065	3.12359	1.55912	1.52265
C10orf35	0.425434	0.260299	0.136423	0.173028
C10orf53	0	0	0	0
C10orf54	23.8243	22.7576	115.082	111.845
C10orf55	4.32151	5.02005	6.68471	7.19797
C10orf62	0	0	0	0
C10orf67	0	0	0	0
C10orf71	0	0	1.61758	1.2112
C10orf71-AS1	0.0223913	0	0.136423	0
C10orf76	30.0267	31.3474	31.4162	30.2799
C10orf82	0.0223913	0	0.0194889	0.0346056
C10orf88	16.4128	14.837	23.2113	22.1476
C10orf90	1.92565	2.08239	0.116934	0.0692113
C10orf91	0.0223913	0	0.0194889	0
C10orf95	0	0.0371856	0.0194889	0.0346056
C10orf99	0	0	0	0
C11orf1	7.38911	8.03208	7.79558	7.9593
C11orf16	0	0	0	0
C11orf21	0.0447825	0.0371856	0.116934	0.0346056
C11orf24	57.5679	58.7904	63.2027	63.6398
C11orf30	34.6169	34.471	27.265	28.7919
C11orf31	47.9173	47.0026	39.1923	40.9039
C11orf40	0	0	0	0
C11orf42	0	0	0	0
C11orf44	0.111956	0.0743712	0.0779558	0
C11orf45	9.49389	8.99891	2.43612	2.80306
C11orf49	23.6899	24.2078	27.421	27.6153
C11orf52	1.43707	1.04082	1.861	1.62646
C11orf53	0	0	0	0
C11orf54	14.5543	15.432	39.1923	39.1044
C11orf57	36.2514	40.272	34.3395	34.9171
C11orf58	157.746	158.782	134.298	133.578
C11orf63	0.246304	0.0371856	0.233867	0.311451
C11orf65	0.403043	0.297485	0.37029	0.346056
C11orf68	65.5392	62.5461	45.7016	44.7451
C11orf70	5.30673	5.57784	3.44954	3.42596
C11orf71	3.91847	3.49544	4.85275	5.08703
C11orf72	0	0	0	0.0346056
C11orf73	36.229	35.7725	32.0203	31.0066
C11orf74	10.7702	11.4903	17.9883	17.4758
C11orf80	6.60542	6.24718	4.03421	4.70637
C11orf84	25.6828	27.1827	12.6288	10.6239
C11orf85	0	0	0	0
C11orf86	0	0	0	0
C11orf87	0.134348	0.0743712	0.0584668	0
C11orf88	0	0	0	0
C11orf91	0.582173	0.260299	0.0584668	0
C11orf94	0	0	0	0
C11orf95	30.0715	30.3806	28.9216	29.2072
C11orf96	0	0.0371856	1.65656	1.62646
C11orf97	0	0	0	0
C11orf98	20.8369	21.5963	18.1998	16.6398
C12orf10	23.6228	22.0139	21.9251	23.3242
C12orf29	20.2193	18.5928	14.2269	13.0809
[truncated: 24,425 more rows]
