# Supplementary material for: Systematic Identification and Functional Validation of New snoRNAs in Human Muscle Progenitors
Source: Noncoding RNA. 2021 Sep 13;7(3):56. doi: 10.3390/ncrna7030056 (PMC8482216; doi:10.3390/ncrna7030056)
Supplement: Supplementary file 1 [file ncrna-07-00056-s001.zip › TableS4.xlsx]

## Sheet: Feuil1
Oligonucleotide name	Oligonucleotide sequence (5 '→ 3')	Application
#4 F	GGTTTCCTGGGGGGTGGG	PCR
#4 R	CCCAGGTGAGGCTCCTTACTC	PCR
#8 F	TGGTCAGGATTTACCTCTGAGGCATT	PCR
#8 R	TGCCTACAAAAATGCAGCAAAGTCG	PCR
#16 F	GGGGAATGTTACAGTCCTGCT	PCR
#16 R	TCCAGGCAGGGGGGACAT	PCR
#26 F	GGGAACATCCAGTGCCCC	PCR
#26 R	TAACCAGCCCTGTTCCCCAAAT	PCR
#38 F	CCCCAAACAATGATGGAGTTGCA	PCR
#38 R	TCCCAAAGCTCAGAGTAGCCG	PCR
#41 F	TGGGGTGGAAGGGGACAAAC	PCR
#41 R	GGGAGGCAGGTAGGAGAAAGC	PCR
#57 F	CTTCAGGGATTTGATGATGTTTACGA	PCR
#57 R	TTCAGGGTTTTCAGATTCTTTGTCA	PCR
#80 F	GTGAGTAGCGAGTTCTTAGATCCT	PCR
#80 R	AGACATCCTCAGCACCCACA	PCR
#130 F	TGCCTTTGTGAATGCCAGAGG	PCR
#130 R	AGAGCTCAGTTCCAAACAACAGA	PCR
#138 F	ACATGATCAACAAACTGCTGCTG	PCR
#138 R	ATGTACCAGGCAGCCCAAG	PCR
#175 F	TGTAGCAACTGTCTTGTAG	PCR
#175 R	ATGGGACTTTTCTGTAGG	PCR
#170 F	TGAGCCGTGCTCAGGTTCAC	PCR
#170 R	TGGATTCTCAGTGTCCGACAGA	PCR
#195 F	GTATGTTTTTGTTTAACTTGTAT	PCR
#195 R	TTCTTATATGTATCCATTCTG	PCR
#198 F	GCGGTGGCTGGCACGAACTT	PCR
#198 R	AGCACGCAGCAACGCAGCTC	PCR
#205 F	TCATTGGTCGTGGTTGTAGCC	PCR
#205 R	GAAAACCCCACAAACCCCATT	PCR
#221 F	GGGTCAATGATGTAATGGCATGT	PCR
#221 R	CACCCAGCTTCAGTGTAATT	PCR
#224 F	CCTTAAAGTCAAGCTGAGTCTGCTG	PCR
#224 R	TGCTGTCGGTAGATAAGTAGGTCT	PCR
#227 F	GTGGACAAAGACTTTAGGAA	PCR
#227 R	GGTATCATAGTATCCATTCTG	PCR
#261 F	TGCAGGACCCAACCTGTA	PCR
#261 R	TCAGAAGAGAAAATGACTTTG	PCR
#275 F	TTCTGATTTTGTAATAATCACGATG	PCR
#275 R	AGCATTTATAAAACCAGACCTG	PCR
#281 F	TAACTTGTGGACAAAGACTTG	PCR
#281 R	ATACTGAACAATGAGTTCCA	PCR
#282 F	TCAAAATGTCACTTCTACTTCACACCA	PCR
#282 R	TGAGAGTGACCCAAAATGAAAAGAA	PCR
#285 F	ACTGGGCTCTGATCACTCCG	PCR
#285 R	TCCCCAGGTAGCCATGGTCT	PCR
#293 F	TCGTAGTGTTCTGGCGAGCAG	PCR
#293 R	CACACAATAGCTAAGACCCAAACTGG	PCR
#299 F	TTCAACTATGATTTTTATTTGTTTGA	PCR
#299 R	AAGATATGGTGACTAAAGATA	PCR
#300 F	CCAGGCAGGGTATGTATGTTTCTG	PCR
#300 R	TGGTGTGCTACGGTACTTGGA	PCR
#331 F	CAGGCCAGTGATGTCTCAAAGA	PCR
#331 R	AGATGAGCTGCGGGGATCTG	PCR
#341 F	AGCTACACTCTGGTTCGTCC	PCR
#341 R	GCCCTGAAGCGCATACACAC	PCR
#346 F	CGAAAGTGGCTTTAACGTATCTGAACA	PCR
#346 R	AGCCCATAGTGCGGTATCTAATCCCAGT	PCR
#349 F	CCTTTGAAGACATCACAAGTC	PCR
#349 R	GCATATGATGGAAAAATCTTAATCTT	PCR
#357 F	TCCTGATGATGGTAGTCAAGAC	PCR
#357 R	CAATCAGAGTGGGGAAATGCTC	PCR
#358 F	TTTGGGGCCTAAGACCAACG	PCR
#358 R	CAGAGGCTCACAGCCCCTTA	PCR
#391 F	GGTCAATGATGTAATGGCATGT	PCR
#391 R	AGGTCTTGGTGTAATTTTAGAATTCACT	PCR
#392 F	AACTTGTGGACAAGGCTTATT	PCR
#392 R	ATACTGAACAATGAGTTCTGAGTG	PCR
#397 F	GCATTCCTGTAGCCTGCACG	PCR
#397 R	ACTGTCTTATAGTTCTTTCCCATAGA	PCR
180B F	GCACTGGGCTCTGACTGCCC	PCR
180B R	GAACCCCGGATGTCAAAGGT	PCR
18s rRNA F	ATGGTAGTCGCCGTGCCTAC	PCR
18s rRNA R	CCGGAATCGAACCCTGATT	PCR
ACA 36B F	GTGTTAAGTTCAGTTCAGGGTAG	PCR
ACA 36B R	CATTTTGTAGGCTGGGGATAAATG	PCR
CTRL shRNA	AAGGCTTACGCTGAGTACTTCGACTTGCTTCTCGAAGTACTCAGCGTAAGTATAGTGA	RNA interference
MALAT1 For	AGGTTTCCCAGAGTCCTTGG	PCR
MALAT1 Rev	GCTTTCCTCCAAACCCCAAG	PCR
NEAT1 For	GGCAGGTCTAGTTTGGGCAT	PCR
NEAT1 Rev	CCTCATCCCTCCCAGTACCA	PCR
Pre-miR21 F	GCTTATCAGACTGATGTTGACTG	PCR
Pre-miR21 R	CAGCCCATCGACTGGTG	PCR
PRP8 F	CCCCGCTACCGGACTACAT	PCR, qPCR
PRP8 R	GCCATTTTCGAGCTTTCTCCTG	PCR, qPCR
PRP8 shRNA	AAGGCCCATCATGTGAACAACGATTCTTGCTTCAATCGTTGTTCACATGATGGGTATAGTGA	RNA interference
Sca9 F	TAGCCAAATCTGAGCATCAGAAG	PCR
Sca9 R	TAAAACCTTTTCATCATTGCCC	PCR
snord115-9 F	GGTCGATGATGAGAACCTTATATTGTCC	PCR
snord115-9 R	GGGCCTCAGCGTAATCCTATTG	PCR
tRNAlys F	TAAAAACACAGCGCCCAACG	PCR, qPCR
tRNAlys R	CAGTGCCCGGCTAGCTCAGT	PCR, qPCR
TU#293 F	TTGGGGTCTTTCAATGTTTTG	PCR
TU#293 R	AGAGACTGGTGGCATTTTGC	PCR
TU#342 F	GTCCTCCGTGGCTGCCTCTA	PCR
TU#342 R	TCCCCGGAAATGAATGAATGA	PCR
TU#351 F	GACCCTGCCTAGGACCGAGAA	PCR
TU#351 R	TTGAGCCTTGAACCTCTCTCAACA	PCR
TU#366 F	ACGCAGGTCTCCCGACTTTG	PCR
TU#366 R	GGGCAGAGCAGAGGTGGGTA	PCR
U1 snRNP70 F	TCGTGGCGAGAGTGAATTATGA	PCR, qPCR
U1 snRNP70 R	TGATAGGTCCGTACACCTCAAA	PCR, qPCR
U1 snRNP70 shRNA	AAGGTCTACAGTAAGCGGTCATTCTTGCTTCAATGACCGCTTACTGTAGACCTATAGTGA	RNA interference
U16 F	CAATGATGTCGTAATTTGCGTCTT	PCR
U16 R	GCTCAGTAAGAATTTTCGTCAACC	PCR
U2AF65 F	CCCAGGCTTTGAGCACATCA	PCR, qPCR
U2AF65 R	GCATGGCCTTGTACTGCATTG	PCR, qPCR
U2AF65 shRNA	AAGGCCAACTACCTGAACGATGATTCTTGCTTCAATCATCGTTCAGGTAGTTGGTATAGTGA	RNA interference
U6 F	CTCGCTTCGGCAGCACA	PCR, qPCR
U6 R	AACGCTTCACGAATTTGCGT	PCR, qPCR
